# Supplementary material for: Broad cross neutralizing antibodies against sarbecoviruses generated by SARS-CoV-2 infection and vaccination in humans
Source: PubMed Central journal article supplement — NPJ Vaccines. 2024 Oct 22;9:195. doi: 10.1038/s41541-024-00997-8 (PMC11496711; doi:10.1038/s41541-024-00997-8), 2024-10-22
Supplement: 41541_2024_997_MOESM1_ESM.pdf [file 41541_2024_997_MOESM1_ESM.pdf]

## Supplementary Figure 1

### Healthy donors

A

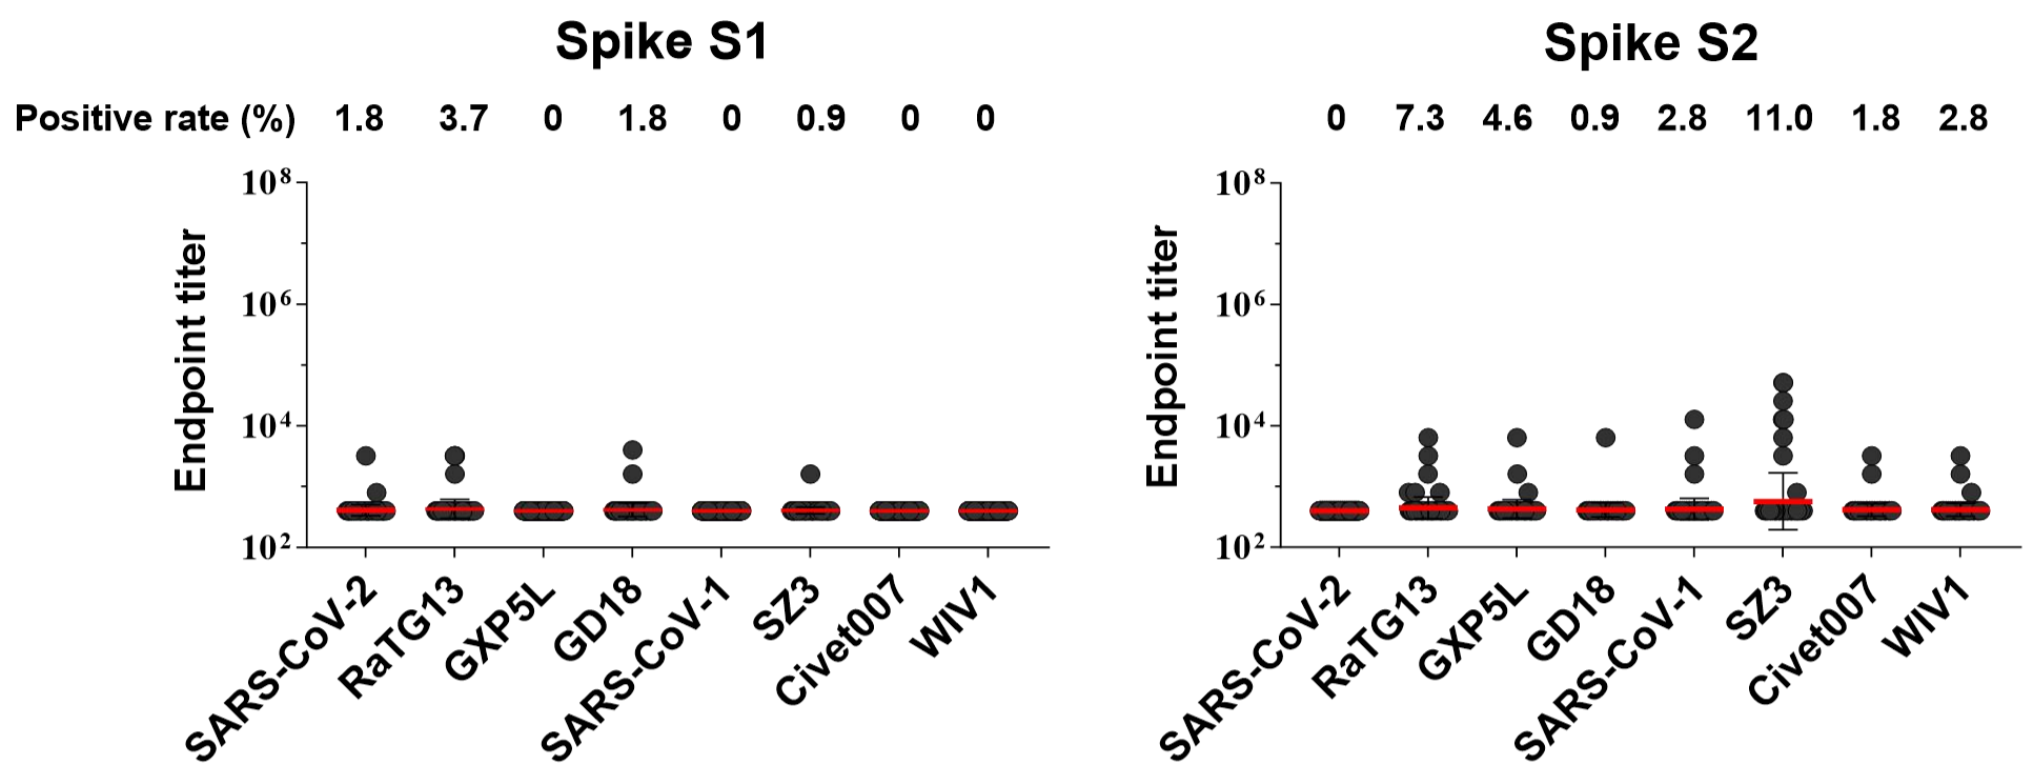

B

### Pre-vaccination

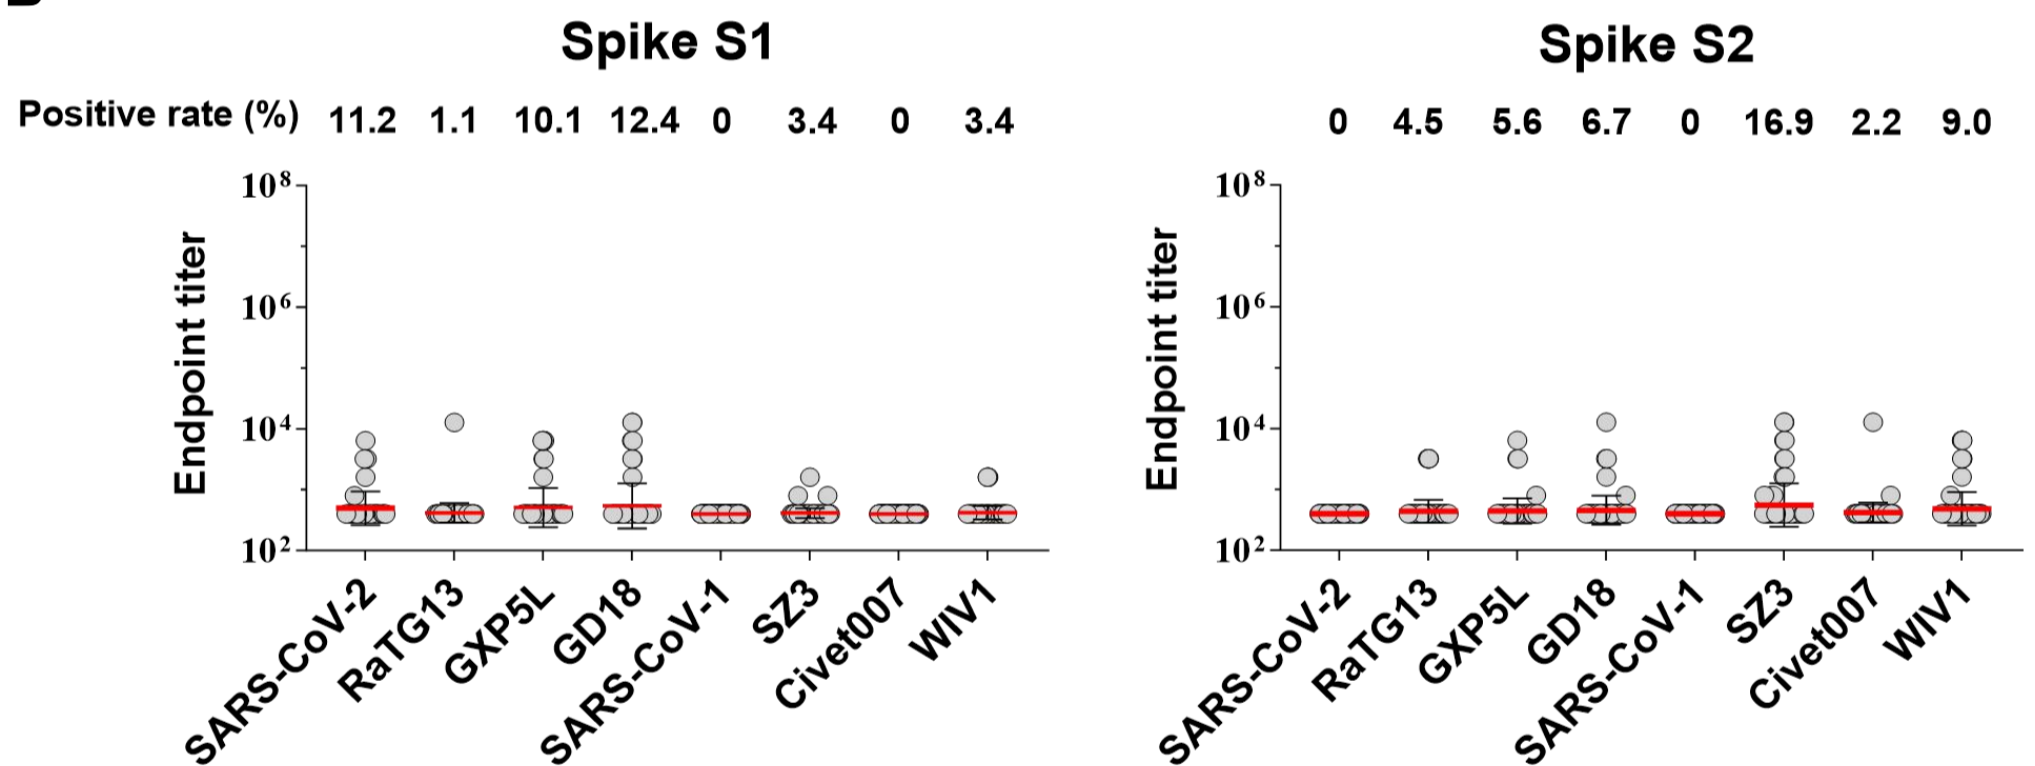

### Supplementary Figure 1. Antibody reactivity against sarbecoviruses in pre-pandemic healthy donors and pre-vaccination donors

(A-B) Endpoint titers of plasma IgG antibodies from 119 pre-pandemic healthy donors (A) and 89 pre-vaccination donors (B), determined by antibody binding to sarbecoviruses spike S1 (left) and S2 (right) and displayed as final dilution titers. A value of  $ED_{50} > 400$  was considered positive for binding. Data are representative of technical triplicates.

Supplementary Figure 2

A

|                   |      |      |
|-------------------|------|------|
| Positive rate (%) | 3.67 | 1.83 |
| Titer (median)    | 1.48 | 1.48 |

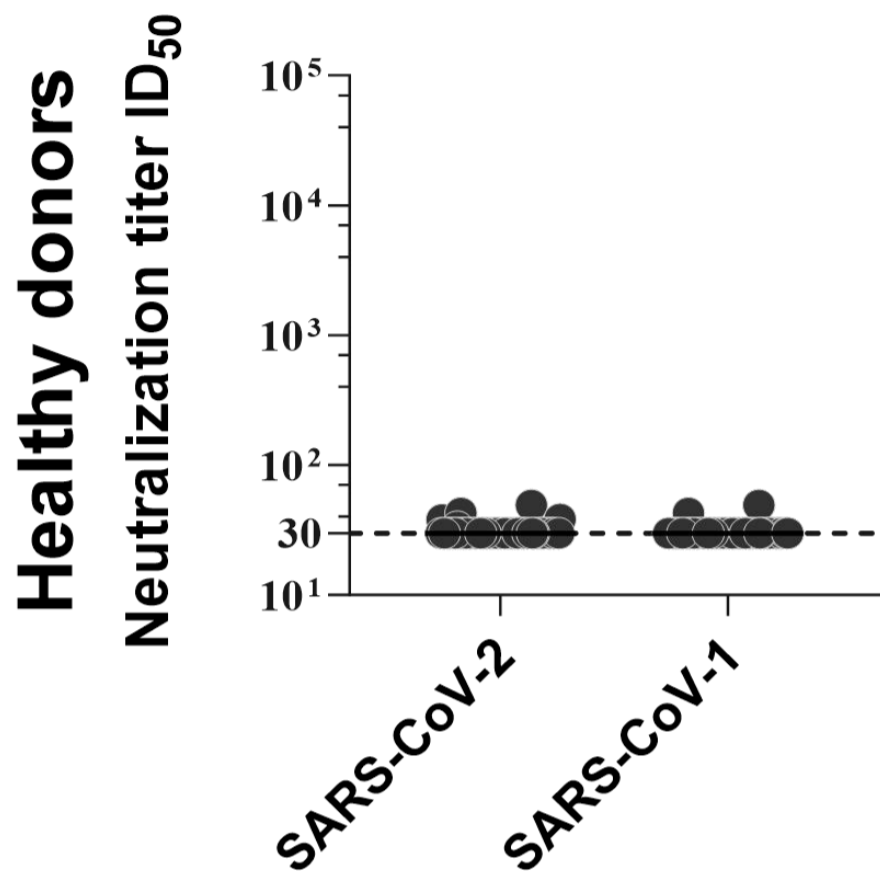

B

|                   |      |      |
|-------------------|------|------|
| Positive rate (%) | 2.25 | 4.49 |
| Titer (median)    | 1.48 | 1.48 |

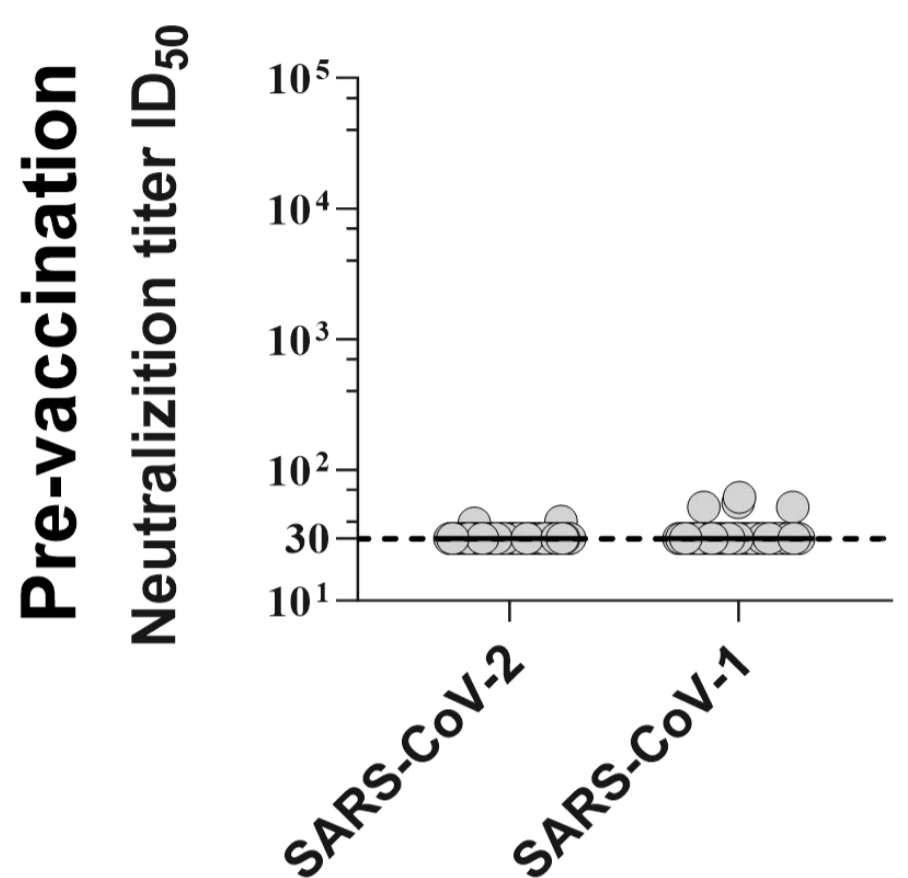

**Supplementary Figure 2. Neutralization activity against sarbecoviruses in plasma from pre-pandemic healthy donors and pre-vaccination individuals**

(A–B) Neutralization titers of plasma samples from 119 pre-pandemic healthy donors (A) and 89 pre-vaccination individuals (B) against sarbecovirus-pseudotyped viruses. The dashed lines represent the cut-off values ( $ID_{50} = 30$ ), and a  $ID_{50}$  value  $> 30$  was considered positive for neutralization. Data are representative of technical triplicates. The positive rates and mean titers (after index conversion) are shown.

## Supplementary Figure 3

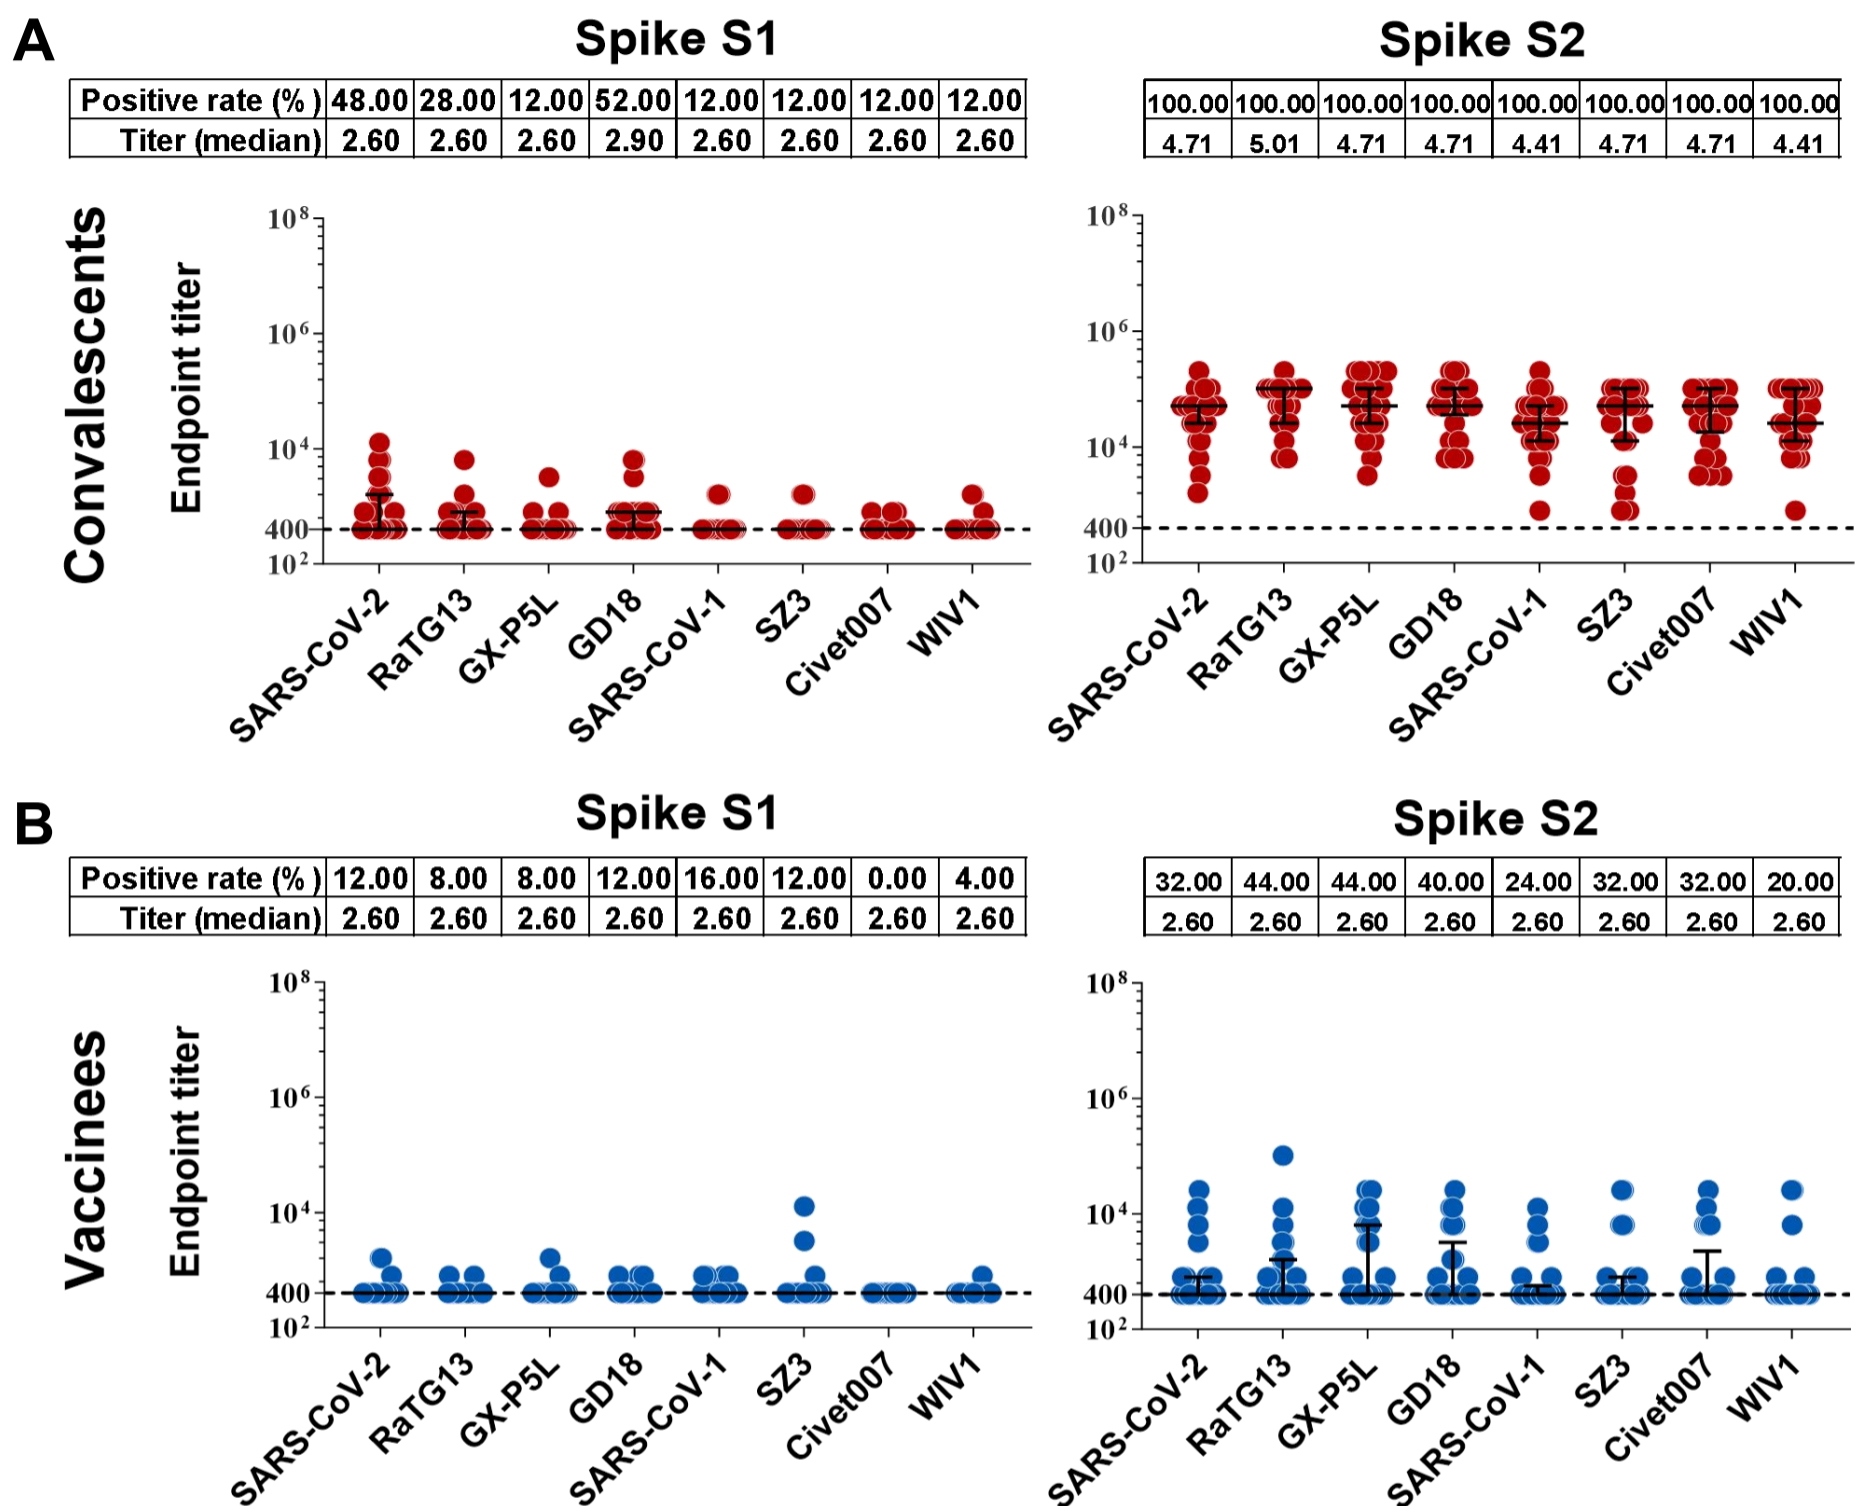

**Supplementary Figure 3. Antibody responses to sarbecoviruses in COVID-19 convalescents before vaccination and vaccinees before receiving a third booster dose** (A–B) Endpoint titers of serum IgG antibodies from 25 COVID-19 convalescents before vaccination (A) and 25 vaccinees before receiving a third booster dose (B), determined by antibody binding to sarbecovirus spike S1 (left) and S2 (right) protein subunits. The dashed lines represent the cut-off values (endpoint titer = 400); an endpoint titer value > 400 was considered positive for binding. Data are representative of technical triplicates and are presented as medians  $\pm$  interquartile ranges (IQR, 25–75%), and the error bars indicate medians with IQR. The positive rates and mean titers (after index conversion) are shown.

**Supplementary Table 1. Baseline characteristics of COVID-19 convalescents recruited in this study**

| <b>Patient ID</b> | <b>Sex</b> | <b>Severity of disease</b> | <b>Age (year)</b> | <b>Course of disease (day)</b> | <b>Sample collection time (day after illness onset)</b> |
|-------------------|------------|----------------------------|-------------------|--------------------------------|---------------------------------------------------------|
| Patient 1         | Male       | Non-severe                 | 29                | 16                             | 48                                                      |
| Patient 2         | Male       | Non-severe                 | 48                | 12                             | 42                                                      |
| Patient 3         | Male       | Severe                     | 47                | 21                             | 53                                                      |
| Patient 4         | Female     | Non-severe                 | 29                | 20                             | 50                                                      |
| Patient 5         | Female     | Non-severe                 | 20                | 15                             | 44                                                      |
| Patient 6         | Female     | Non-severe                 | 50                | 23                             | 54                                                      |
| Patient 7         | Female     | Non-severe                 | 46                | 16                             | 43                                                      |
| Patient 8         | Male       | Non-severe                 | 43                | 25                             | 52                                                      |
| Patient 9         | Female     | Non-severe                 | 43                | 24                             | 59                                                      |
| Patient 10        | Female     | Non-severe                 | 45                | 25                             | 63                                                      |
| Patient 11        | Male       | Severe                     | 54                | 28                             | 62                                                      |
| Patient 12        | Male       | Non-severe                 | 43                | 27                             | 76                                                      |
| Patient 13        | Female     | Severe                     | 72                | 22                             | 65                                                      |
| Patient 14        | Male       | Non-severe                 | 47                | 17                             | 66                                                      |
| Patient 15        | Female     | Non-severe                 | 19                | 24                             | 149                                                     |
| Patient 16        | Male       | Non-severe                 | 45                | 21                             | 48                                                      |
| Patient 17        | Female     | Non-severe                 | 45                | 18                             | 48                                                      |
| Patient 18        | Female     | Non-severe                 | 51                | 15                             | 45                                                      |
| Patient 19        | Female     | Non-severe                 | 69                | 18                             | 47                                                      |
| Patient 20        | Female     | Non-severe                 | 47                | 24                             | 54                                                      |
| Patient 21        | Male       | Severe                     | 53                | 29                             | 59                                                      |
| Patient 22        | Male       | Non-severe                 | 62                | 22                             | 52                                                      |
| Patient 23        | Female     | Non-severe                 | 46                | 11                             | 49                                                      |
| Patient 24        | Male       | Severe                     | 62                | 15                             | 46                                                      |
| Patient 25        | Male       | Non-severe                 | 20                | 13                             | 47                                                      |
| Patient 26        | Female     | Non-severe                 | 41                | 24                             | 48                                                      |
| Patient 27        | Male       | Non-severe                 | 22                | 14                             | 42                                                      |
| Patient 28        | Male       | Non-severe                 | 33                | 17                             | 43                                                      |
| Patient 29        | Male       | Severe                     | 43                | 21                             | 49                                                      |
| Patient 30        | Female     | Non-severe                 | 39                | 23                             | 51                                                      |
| Patient 31        | Female     | Non-severe                 | 41                | 16                             | 43                                                      |
| Patient 32        | Female     | Non-severe                 | 39                | 19                             | 48                                                      |
| Patient 33        | Male       | Severe                     | 43                | 13                             | 45                                                      |
| Patient 34        | Male       | Severe                     | 62                | 17                             | 50                                                      |
| Patient 35        | Male       | Non-severe                 | 23                | 16                             | 45                                                      |
| Patient 36        | Male       | Non-severe                 | 47                | 16                             | 44                                                      |
| Patient 37        | Male       | Non-severe                 | 23                | 17                             | 47                                                      |
| Patient 38        | Female     | Non-severe                 | 32                | 16                             | 48                                                      |
| Patient 39        | Female     | Non-severe                 | 30                | 17                             | 47                                                      |
| Patient 40        | Male       | Non-severe                 | 82                | 20                             | 50                                                      |
| Patient 41        | Male       | Non-severe                 | 40                | 20                             | 49                                                      |
| Patient 42        | Female     | Non-severe                 | 28                | 28                             | 58                                                      |
| Patient 43        | Female     | Non-severe                 | 21                | 22                             | 51                                                      |
| Patient 44        | Male       | Non-severe                 | 41                | 23                             | 55                                                      |
| Patient 45        | Female     | Non-severe                 | 50                | 25                             | 61                                                      |
| Patient 46        | Male       | Non-severe                 | 36                | 18                             | 59                                                      |
| Patient 47        | Female     | Severe                     | 34                | 28                             | 57                                                      |
| Patient 48        | Male       | Non-severe                 | 23                | 19                             | 56                                                      |

|                   |        |            |            |            |         |
|-------------------|--------|------------|------------|------------|---------|
| <b>Patient 49</b> | Female | Non-severe | 30         | 18         | 54      |
| <b>Patient 50</b> | Female | Severe     | 67         | 25         | 55      |
| <b>Patient 51</b> | Male   | Non-severe | 27         | 14         | 51      |
| <b>Patient 52</b> | Male   | Severe     | 81         | 30         | 57      |
| <b>Patient 53</b> | Female | Severe     | 84         | 35         | 61      |
| <b>Patient 54</b> | Male   | Non-severe | 22         | 18         | 45      |
| <b>Patient 55</b> | Female | Non-severe | 54         | 14         | 44      |
| <b>Patient 56</b> | Male   | Severe     | 33         | 27         | 62      |
| <b>Patient 57</b> | Female | Non-severe | 42         | 29         | 59      |
| <b>Patient 58</b> | Male   | Non-severe | 38         | 32         | 64      |
| <b>Patient 59</b> | Male   | Non-severe | 29         | 12         | 63      |
| <b>Patient 60</b> | Male   | Severe     | 53         | 24         | 54      |
| <b>Patient 61</b> | Male   | Severe     | 64         | 27         | 62      |
| <b>Patient 62</b> | Female | Non-severe | 53         | 29         | 64      |
| <b>Patient 63</b> | Male   | Non-severe | 23         | 23         | 79      |
| <b>Patient 64</b> | Female | Non-severe | 50         | 17         | 67      |
| <b>Patient 65</b> | Female | Severe     | 59         | 28         | 79      |
| <b>Patient 66</b> | Female | Non-severe | 29         | 30         | 71      |
| <b>Patient 67</b> | Female | Severe     | 82         | 22         | 65      |
| <b>Patient 68</b> | Female | Non-severe | 47         | 45         | 86      |
| <b>Patient 69</b> | Female | Non-severe | 43         | 12         | 68      |
| <b>Patient 70</b> | Male   | Non-severe | 52         | 19         | 142     |
| <b>Patient 71</b> | Female | Non-severe | 56         | 16         | 155     |
| <b>Patient 72</b> | Male   | Severe     | 38         | 17         | 254     |
| <b>Patient 73</b> | Female | Non-severe | 8          | 11         | 369     |
| <b>Media</b>      |        |            | 43         | 20         | 54      |
| <b>(IQR)</b>      |        |            | (30-52.25) | (16-24.25) | (48-63) |

IQR: Interquartile range.

**Supplementary Table 2. Baseline characteristics of vaccine recipients recruited in this study**

| Vaccine recipient ID | Sex    | Age (year) | Type of vaccine administered |             | Intervals between dose 1 and 2 (day) | Sample collection time (day after standard two-dose administration) |
|----------------------|--------|------------|------------------------------|-------------|--------------------------------------|---------------------------------------------------------------------|
|                      |        |            | First dose                   | Second dose |                                      |                                                                     |
| Vaccine recipient 1  | Male   | 25         | Sinovac                      | Sinovac     | 24                                   | 17                                                                  |
| Vaccine recipient 2  | Female | 44         | Sinovac                      | Sinovac     | 24                                   | 18                                                                  |
| Vaccine recipient 3  | Female | 26         | Sinovac                      | Sinovac     | 25                                   | 16                                                                  |
| Vaccine recipient 4  | Female | 32         | Sinovac                      | Sinovac     | 24                                   | 18                                                                  |
| Vaccine recipient 5  | Male   | 34         | Sinovac                      | Sinovac     | 31                                   | 13                                                                  |
| Vaccine recipient 6  | Female | 33         | Sinovac                      | Sinovac     | 24                                   | 17                                                                  |
| Vaccine recipient 7  | Female | 26         | Sinovac                      | Sinovac     | 25                                   | 16                                                                  |
| Vaccine recipient 8  | Male   | 45         | Sinovac                      | Sinovac     | 25                                   | 16                                                                  |
| Vaccine recipient 9  | Female | 35         | Sinovac                      | Sinovac     | 25                                   | 16                                                                  |
| Vaccine recipient 10 | Female | 42         | Sinovac                      | Sinovac     | 25                                   | 16                                                                  |
| Vaccine recipient 11 | Male   | 26         | Sinovac                      | Sinovac     | 24                                   | 17                                                                  |
| Vaccine recipient 12 | Female | 31         | Sinovac                      | Sinovac     | 24                                   | 17                                                                  |
| Vaccine recipient 13 | Male   | 40         | Sinovac                      | Sinovac     | 24                                   | 17                                                                  |
| Vaccine recipient 14 | Female | 30         | Sinovac                      | Sinovac     | 30                                   | 13                                                                  |
| Vaccine recipient 15 | Female | 33         | Sinovac                      | Sinovac     | 24                                   | 17                                                                  |
| Vaccine recipient 16 | Female | 45         | Sinovac                      | Sinovac     | 18                                   | 23                                                                  |
| Vaccine recipient 17 | Male   | 33         | Sinovac                      | Sinovac     | 24                                   | 17                                                                  |
| Vaccine recipient 18 | Male   | 23         | Sinovac                      | Sinovac     | 25                                   | 17                                                                  |
| Vaccine recipient 19 | Female | 45         | Sinovac                      | Sinovac     | 24                                   | 17                                                                  |
| Vaccine recipient 20 | Female | 35         | Sinovac                      | Sinovac     | 25                                   | 16                                                                  |
| Vaccine recipient 21 | Male   | 45         | Sinovac                      | Sinovac     | 18                                   | 23                                                                  |
| Vaccine recipient 22 | Female | 28         | Sinovac                      | Sinovac     | 25                                   | 16                                                                  |
| Vaccine recipient 23 | Female | 45         | Sinovac                      | Sinovac     | 34                                   | 10                                                                  |
| Vaccine recipient 24 | Female | 34         | Sinovac                      | Sinovac     | 26                                   | 16                                                                  |
| Vaccine recipient 25 | Female | 32         | Sinovac                      | Sinovac     | 25                                   | 16                                                                  |
| Vaccine recipient 26 | Female | 29         | Sinovac                      | Sinovac     | 24                                   | 17                                                                  |
| Vaccine recipient 27 | Male   | 44         | Sinovac                      | Sinovac     | 24                                   | 17                                                                  |
| Vaccine recipient 28 | Female | 45         | Sinovac                      | Sinovac     | 25                                   | 16                                                                  |
| Vaccine recipient 29 | Female | 53         | Sinovac                      | Sinovac     | 24                                   | 17                                                                  |
| Vaccine recipient 30 | Female | 56         | Sinovac                      | Sinovac     | 24                                   | 17                                                                  |
| Vaccine recipient 31 | Female | 36         | Sinovac                      | Sinovac     | 24                                   | 17                                                                  |
| Vaccine recipient 32 | Female | 37         | Sinovac                      | Sinovac     | 24                                   | 17                                                                  |
| Vaccine recipient 33 | Female | 38         | Sinovac                      | Sinovac     | 18                                   | 23                                                                  |
| Vaccine recipient 34 | Female | 38         | Sinovac                      | Sinovac     | 25                                   | 15                                                                  |
| Vaccine recipient 35 | Female | 36         | Sinovac                      | Sinovac     | 24                                   | 17                                                                  |
| Vaccine recipient 36 | Female | 31         | Sinovac                      | Sinovac     | 25                                   | 14                                                                  |
| Vaccine recipient 37 | Female | 40         | Sinovac                      | Sinovac     | 24                                   | 16                                                                  |
| Vaccine recipient 38 | Female | 41         | Sinovac                      | Sinovac     | 31                                   | 13                                                                  |
| Vaccine recipient 39 | Female | 28         | Sinovac                      | Sinovac     | 24                                   | 16                                                                  |
| Vaccine recipient 40 | Male   | 48         | Sinovac                      | Sinovac     | 24                                   | 16                                                                  |
| Vaccine recipient 41 | Male   | 47         | Sinovac                      | Sinovac     | 24                                   | 16                                                                  |
| Vaccine recipient 42 | Male   | 42         | Sinovac                      | Sinovac     | 24                                   | 16                                                                  |
| Vaccine recipient 43 | Female | 33         | Sinovac                      | Sinovac     | 24                                   | 17                                                                  |
| Vaccine recipient 44 | Male   | 56         | Sinovac                      | Sinovac     | 19                                   | 17                                                                  |
| Vaccine recipient 45 | Female | 34         | Sinovac                      | Sinovac     | 24                                   | 17                                                                  |
| Vaccine recipient 46 | Female | 45         | Sinovac                      | Sinovac     | 24                                   | 16                                                                  |
| Vaccine recipient 47 | Female | 43         | Sinovac                      | Sinovac     | 24                                   | 17                                                                  |
| Vaccine recipient 48 | Female | 46         | Sinovac                      | Sinovac     | 24                                   | 16                                                                  |

|                      |        |         |         |         |         |         |
|----------------------|--------|---------|---------|---------|---------|---------|
| Vaccine recipient 49 | Male   | 49      | Sinovac | Sinovac | 24      | 17      |
| Vaccine recipient 50 | Female | 31      | Sinovac | Sinovac | 31      | 13      |
| Vaccine recipient 51 | Female | 52      | Sinovac | Sinovac | 24      | 25      |
| Vaccine recipient 52 | Female | 49      | Sinovac | Sinovac | 24      | 17      |
| Vaccine recipient 53 | Female | 43      | Sinovac | Sinovac | 25      | 16      |
| Vaccine recipient 54 | Female | 41      | Sinovac | Sinovac | 25      | 15      |
| Vaccine recipient 55 | Female | 37      | Sinovac | Sinovac | 26      | 15      |
| Vaccine recipient 56 | Female | 50      | Sinovac | Sinovac | 25      | 15      |
| Vaccine recipient 57 | Female | 33      | Sinovac | Sinovac | 18      | 23      |
| Vaccine recipient 58 | Female | 33      | Sinovac | Sinovac | 24      | 16      |
| Vaccine recipient 59 | Female | 38      | Sinovac | Sinovac | 20      | 21      |
| Vaccine recipient 60 | Male   | 47      | Sinovac | Sinovac | 31      | 13      |
| Vaccine recipient 61 | Female | 28      | Sinovac | Sinovac | 26      | 15      |
| Vaccine recipient 62 | Female | 52      | Sinovac | Sinovac | 24      | 17      |
| Vaccine recipient 63 | Male   | 34      | Sinovac | Sinovac | 24      | 17      |
| Vaccine recipient 64 | Male   | 31      | Sinovac | Sinovac | 24      | 17      |
| Vaccine recipient 65 | Male   | 38      | Sinovac | Sinovac | 25      | 16      |
| Vaccine recipient 66 | Male   | 33      | Sinovac | Sinovac | 24      | 17      |
| Vaccine recipient 67 | Female | 38      | Sinovac | Sinovac | 25      | 16      |
| Vaccine recipient 68 | Female | 39      | Sinovac | Sinovac | 24      | 17      |
| Vaccine recipient 69 | Female | 37      | Sinovac | Sinovac | 24      | 16      |
| Vaccine recipient 70 | Female | 38      | Sinovac | Sinovac | 23      | 16      |
| Vaccine recipient 71 | Female | 39      | Sinovac | Sinovac | 26      | 15      |
| Vaccine recipient 72 | Male   | 32      | Sinovac | Sinovac | 25      | 16      |
| Vaccine recipient 73 | Female | 37      | Sinovac | Sinovac | 23      | 15      |
| Vaccine recipient 74 | Female | 45      | Sinovac | Sinovac | 24      | 17      |
| Vaccine recipient 75 | Male   | 35      | Sinovac | Sinovac | 25      | 16      |
| Vaccine recipient 76 | Female | 36      | Sinovac | Sinovac | 23      | 16      |
| Vaccine recipient 77 | Male   | 35      | Sinovac | Sinovac | 24      | 17      |
| Vaccine recipient 78 | Female | 33      | Sinovac | Sinovac | 24      | 16      |
| Vaccine recipient 79 | Female | 33      | Sinovac | Sinovac | 24      | 16      |
| Vaccine recipient 80 | Male   | 33      | Sinovac | Sinovac | 24      | 16      |
| Vaccine recipient 81 | Female | 29      | Sinovac | Sinovac | 31      | 13      |
| Vaccine recipient 82 | Male   | 54      | Sinovac | Sinovac | 24      | 16      |
| Vaccine recipient 83 | Female | 37      | Sinovac | Sinovac | 24      | 16      |
| Vaccine recipient 84 | Female | 24      | Sinovac | Sinovac | 31      | 13      |
| Vaccine recipient 85 | Female | 29      | Sinovac | Sinovac | 31      | 13      |
| Vaccine recipient 86 | Male   | 51      | Sinovac | Sinovac | 25      | 16      |
| Vaccine recipient 87 | Female | 51      | Sinovac | Sinovac | 25      | 17      |
| Vaccine recipient 88 | Male   | 48      | Sinovac | Sinovac | 24      | 19      |
| Vaccine recipient 89 | Female | 24      | Sinovac | Sinovac | 30      | 13      |
| Media                |        | 37      |         |         | 24      | 16      |
| (IQR)                |        | (32-45) |         |         | (24-25) | (16-17) |

IQR: Interquartile range.

Supplementary Table 3. Neutralization titer against sarbecoviruses in COVID-19 convalescents

| Patient ID | Neutralization breadth<br>(number of sarbecoviruses, n) | Neutralization titer (ID <sub>50</sub> ) |        |        |      |            |     |          |      |
|------------|---------------------------------------------------------|------------------------------------------|--------|--------|------|------------|-----|----------|------|
|            |                                                         | SARS-CoV-2                               | RaTG13 | GX-P5L | GD18 | SARS-CoV-1 | SZ3 | Civet007 | WIV1 |
| Patient 1  | 7                                                       | 133                                      | 106    | 80     | 2248 | 70         | 66  | 30       | 436  |
| Patient 2  | 4                                                       | 192                                      | 30     | 55     | 994  | 30         | 30  | 30       | 297  |
| Patient 3  | 7                                                       | 653                                      | 84     | 113    | 1919 | 43         | 55  | 30       | 1593 |
| Patient 4  | 6                                                       | 1252                                     | 232    | 861    | 3911 | 30         | 100 | 30       | 136  |
| Patient 5  | 3                                                       | 30                                       | 30     | 80     | 398  | 30         | 101 | 30       | 30   |
| Patient 6  | 8                                                       | 842                                      | 1041   | 628    | 2778 | 44         | 247 | 84       | 653  |
| Patient 7  | 7                                                       | 578                                      | 30     | 342    | 1756 | 40         | 61  | 36       | 190  |
| Patient 8  | 6                                                       | 277                                      | 479    | 412    | 1551 | 30         | 92  | 30       | 153  |
| Patient 9  | 6                                                       | 207                                      | 67     | 31     | 4921 | 30         | 53  | 30       | 47   |
| Patient 10 | 7                                                       | 589                                      | 142    | 42     | 2053 | 88         | 69  | 30       | 465  |
| Patient 11 | 8                                                       | 1009                                     | 96     | 366    | 3866 | 40         | 65  | 59       | 804  |
| Patient 12 | 1                                                       | 30                                       | 30     | 30     | 121  | 30         | 30  | 30       | 30   |
| Patient 13 | 8                                                       | 1209                                     | 274    | 509    | 1633 | 31         | 244 | 428      | 163  |
| Patient 14 | 6                                                       | 2147                                     | 176    | 240    | 3027 | 30         | 114 | 30       | 390  |
| Patient 15 | 7                                                       | 1286                                     | 201    | 1039   | 2915 | 66         | 78  | 30       | 1247 |
| Patient 16 | 5                                                       | 254                                      | 30     | 381    | 518  | 56         | 30  | 30       | 161  |
| Patient 17 | 7                                                       | 841                                      | 177    | 71     | 2478 | 30         | 100 | 51       | 48   |
| Patient 18 | 7                                                       | 1120                                     | 1099   | 367    | 5161 | 33         | 124 | 30       | 221  |
| Patient 19 | 8                                                       | 1538                                     | 867    | 347    | 4485 | 32         | 212 | 217      | 181  |
| Patient 20 | 0                                                       | 30                                       | 30     | 30     | 30   | 30         | 30  | 30       | 30   |
| Patient 21 | 7                                                       | 2482                                     | 854    | 125    | 1626 | 30         | 117 | 74       | 77   |
| Patient 22 | 7                                                       | 1170                                     | 215    | 295    | 3378 | 30         | 294 | 107      | 776  |
| Patient 23 | 6                                                       | 490                                      | 48     | 153    | 2843 | 30         | 151 | 30       | 63   |
| Patient 24 | 8                                                       | 1905                                     | 56     | 249    | 4275 | 47         | 583 | 222      | 163  |
| Patient 25 | 7                                                       | 654                                      | 799    | 682    | 2975 | 30         | 131 | 81       | 117  |
| Patient 26 | 8                                                       | 3782                                     | 836    | 1853   | 3929 | 34         | 128 | 152      | 541  |
| Patient 27 | 7                                                       | 928                                      | 842    | 758    | 4334 | 30         | 110 | 63       | 522  |
| Patient 28 | 7                                                       | 166                                      | 110    | 183    | 706  | 30         | 106 | 147      | 134  |
| Patient 29 | 3                                                       | 32                                       | 30     | 40     | 30   | 30         | 98  | 30       | 30   |
| Patient 30 | 7                                                       | 2277                                     | 334    | 1467   | 5703 | 30         | 113 | 92       | 76   |
| Patient 31 | 7                                                       | 1369                                     | 195    | 721    | 4610 | 30         | 212 | 152      | 401  |
| Patient 32 | 5                                                       | 263                                      | 161    | 91     | 1148 | 30         | 59  | 30       | 30   |
| Patient 33 | 5                                                       | 437                                      | 198    | 89     | 3286 | 30         | 80  | 30       | 30   |
| Patient 34 | 6                                                       | 297                                      | 148    | 104    | 4793 | 30         | 276 | 30       | 81   |
| Patient 35 | 7                                                       | 1117                                     | 708    | 451    | 6146 | 30         | 219 | 319      | 360  |
| Patient 36 | 7                                                       | 3159                                     | 480    | 129    | 4451 | 30         | 226 | 36       | 255  |
| Patient 37 | 6                                                       | 126                                      | 836    | 98     | 1360 | 30         | 127 | 37       | 30   |
| Patient 38 | 5                                                       | 2575                                     | 1088   | 114    | 1507 | 30         | 99  | 30       | 30   |
| Patient 39 | 7                                                       | 1150                                     | 220    | 434    | 4040 | 30         | 384 | 275      | 187  |
| Patient 40 | 7                                                       | 55                                       | 284    | 49     | 843  | 30         | 82  | 99       | 55   |
| Patient 41 | 7                                                       | 391                                      | 381    | 126    | 2636 | 33         | 130 | 30       | 57   |
| Patient 42 | 6                                                       | 298                                      | 394    | 138    | 1623 | 30         | 124 | 30       | 88   |
| Patient 43 | 7                                                       | 2412                                     | 491    | 380    | 2082 | 30         | 331 | 137      | 224  |
| Patient 44 | 8                                                       | 1316                                     | 74     | 141    | 3676 | 33         | 150 | 63       | 188  |
| Patient 45 | 6                                                       | 46                                       | 203    | 118    | 592  | 30         | 30  | 38       | 58   |
| Patient 46 | 7                                                       | 1105                                     | 245    | 363    | 3419 | 30         | 103 | 210      | 128  |
| Patient 47 | 7                                                       | 1134                                     | 892    | 501    | 4786 | 30         | 372 | 492      | 981  |
| Patient 48 | 7                                                       | 923                                      | 1432   | 443    | 4490 | 30         | 239 | 62       | 240  |



|                   |       |            |          |          |             |         |          |          |          |
|-------------------|-------|------------|----------|----------|-------------|---------|----------|----------|----------|
| <b>Patient 49</b> | 7     | 93         | 40       | 58       | 622         | 30      | 41       | 47       | 84       |
| <b>Patient 50</b> | 8     | 1215       | 39       | 322      | 2857        | 58      | 314      | 427      | 2098     |
| <b>Patient 51</b> | 6     | 1215       | 267      | 913      | 3395        | 30      | 30       | 688      | 410      |
| <b>Patient 52</b> | 7     | 1231       | 651      | 290      | 4930        | 30      | 86       | 568      | 639      |
| <b>Patient 53</b> | 7     | 53         | 115      | 59       | 2826        | 30      | 59       | 78       | 124      |
| <b>Patient 54</b> | 7     | 378        | 650      | 182      | 3356        | 46      | 62       | 30       | 341      |
| <b>Patient 55</b> | 5     | 99         | 135      | 71       | 465         | 30      | 30       | 61       | 30       |
| <b>Patient 56</b> | 7     | 1490       | 1317     | 968      | 5007        | 30      | 891      | 539      | 122      |
| <b>Patient 57</b> | 6     | 281        | 64       | 340      | 1183        | 30      | 108      | 60       | 30       |
| <b>Patient 58</b> | 6     | 454        | 869      | 189      | 4201        | 30      | 74       | 154      | 30       |
| <b>Patient 59</b> | 7     | 139        | 217      | 100      | 1430        | 58      | 30       | 78       | 45       |
| <b>Patient 60</b> | 6     | 131        | 128      | 541      | 760         | 30      | 30       | 85       | 33       |
| <b>Patient 61</b> | 8     | 426        | 487      | 1194     | 4590        | 101     | 109      | 198      | 233      |
| <b>Patient 62</b> | 5     | 48         | 48       | 30       | 350         | 30      | 30       | 51       | 31       |
| <b>Patient 63</b> | 5     | 127        | 214      | 30       | 613         | 30      | 54       | 30       | 44       |
| <b>Patient 64</b> | 7     | 1377       | 652      | 656      | 6123        | 30      | 103      | 342      | 322      |
| <b>Patient 65</b> | 7     | 118        | 133      | 79       | 722         | 30      | 62       | 67       | 51       |
| <b>Patient 66</b> | 7     | 810        | 87       | 1664     | 2896        | 30      | 124      | 587      | 211      |
| <b>Patient 67</b> | 7     | 1150       | 176      | 1184     | 4884        | 30      | 76       | 364      | 276      |
| <b>Patient 68</b> | 7     | 383        | 321      | 2205     | 4722        | 30      | 128      | 221      | 134      |
| <b>Patient 69</b> | 6     | 46         | 30       | 85       | 1345        | 30      | 35       | 80       | 161      |
| <b>Patient 70</b> | 5     | 31         | 30       | 77       | 1195        | 30      | 30       | 123      | 77       |
| <b>Patient 71</b> | 8     | 387        | 1236     | 257      | 4084        | 51      | 73       | 364      | 108      |
| <b>Patient 72</b> | 8     | 469        | 123      | 687      | 4912        | 32      | 292      | 209      | 129      |
| <b>Patient 73</b> | 6     | 110        | 242      | 109      | 1987        | 30      | 43       | 82       | 30       |
| <b>Median</b>     | 7     | 490        | 203      | 240      | 2843        | 30      | 100      | 63       | 134      |
| <b>(IQR)</b>      | (6-7) | (139-1209) | (87-491) | (89-501) | (1345-4275) | (30-32) | (59-131) | (30-154) | (51-297) |

IQR: Interquartile range.

**Supplementary Table 4. Neutralization titer against sarbecoviruses in vaccine recipients**

| Vaccine recipient ID | Neutralization breadth<br>(number of sarbecoviruses, n) | Neutralization titer (ID <sub>50</sub> ) |        |        |      |            |     |          |      |
|----------------------|---------------------------------------------------------|------------------------------------------|--------|--------|------|------------|-----|----------|------|
|                      |                                                         | SARS-CoV-2                               | RaTG13 | GX-P5L | GD18 | SARS-CoV-1 | SZ3 | Civet007 | WIV1 |
| Vaccine recipient 1  | 3                                                       | 98                                       | 142    | 30     | 325  | 30         | 30  | 30       | 30   |
| Vaccine recipient 2  | 6                                                       | 36                                       | 131    | 108    | 607  | 30         | 60  | 30       | 75   |
| Vaccine recipient 3  | 6                                                       | 53                                       | 197    | 53     | 607  | 30         | 56  | 30       | 87   |
| Vaccine recipient 4  | 6                                                       | 121                                      | 128    | 74     | 677  | 30         | 40  | 30       | 151  |
| Vaccine recipient 5  | 7                                                       | 410                                      | 283    | 97     | 930  | 30         | 174 | 86       | 237  |
| Vaccine recipient 6  | 6                                                       | 1021                                     | 984    | 76     | 1308 | 30         | 30  | 34       | 62   |
| Vaccine recipient 7  | 7                                                       | 351                                      | 610    | 91     | 796  | 30         | 78  | 38       | 371  |
| Vaccine recipient 8  | 6                                                       | 308                                      | 207    | 31     | 1588 | 30         | 30  | 61       | 431  |
| Vaccine recipient 9  | 6                                                       | 31                                       | 213    | 30     | 165  | 30         | 49  | 33       | 74   |
| Vaccine recipient 10 | 6                                                       | 362                                      | 50     | 30     | 1208 | 30         | 136 | 44       | 66   |
| Vaccine recipient 11 | 7                                                       | 373                                      | 101    | 57     | 952  | 30         | 88  | 57       | 130  |
| Vaccine recipient 12 | 3                                                       | 113                                      | 30     | 30     | 614  | 30         | 30  | 74       | 30   |
| Vaccine recipient 13 | 5                                                       | 1004                                     | 30     | 36     | 2285 | 30         | 53  | 30       | 123  |
| Vaccine recipient 14 | 8                                                       | 3450                                     | 508    | 745    | 7051 | 565        | 240 | 330      | 34   |
| Vaccine recipient 15 | 4                                                       | 92                                       | 48     | 30     | 471  | 30         | 30  | 30       | 37   |
| Vaccine recipient 16 | 2                                                       | 30                                       | 30     | 30     | 394  | 30         | 30  | 30       | 36   |
| Vaccine recipient 17 | 3                                                       | 130                                      | 223    | 30     | 779  | 30         | 30  | 30       | 30   |
| Vaccine recipient 18 | 4                                                       | 67                                       | 121    | 30     | 391  | 30         | 30  | 43       | 30   |
| Vaccine recipient 19 | 6                                                       | 152                                      | 822    | 47     | 3982 | 30         | 34  | 40       | 30   |
| Vaccine recipient 20 | 3                                                       | 176                                      | 327    | 30     | 3423 | 30         | 30  | 30       | 30   |
| Vaccine recipient 21 | 3                                                       | 30                                       | 120    | 30     | 120  | 30         | 30  | 30       | 40   |
| Vaccine recipient 22 | 5                                                       | 70                                       | 46     | 30     | 240  | 153        | 30  | 30       | 34   |
| Vaccine recipient 23 | 6                                                       | 65                                       | 59     | 30     | 545  | 30         | 54  | 59       | 43   |
| Vaccine recipient 24 | 8                                                       | 45                                       | 75     | 34     | 784  | 69         | 56  | 742      | 76   |
| Vaccine recipient 25 | 2                                                       | 74                                       | 30     | 30     | 211  | 30         | 30  | 30       | 30   |
| Vaccine recipient 26 | 3                                                       | 74                                       | 30     | 30     | 220  | 30         | 30  | 67       | 30   |
| Vaccine recipient 27 | 4                                                       | 125                                      | 44     | 30     | 1133 | 30         | 30  | 83       | 30   |
| Vaccine recipient 28 | 5                                                       | 79                                       | 75     | 30     | 800  | 30         | 30  | 74       | 231  |
| Vaccine recipient 29 | 5                                                       | 165                                      | 35     | 30     | 1013 | 30         | 30  | 56       | 431  |
| Vaccine recipient 30 | 5                                                       | 45                                       | 53     | 30     | 1276 | 30         | 30  | 38       | 685  |
| Vaccine recipient 31 | 4                                                       | 30                                       | 58     | 30     | 290  | 30         | 30  | 33       | 183  |
| Vaccine recipient 32 | 4                                                       | 30                                       | 31     | 30     | 45   | 30         | 30  | 34       | 51   |
| Vaccine recipient 33 | 4                                                       | 30                                       | 47     | 30     | 359  | 30         | 30  | 241      | 131  |
| Vaccine recipient 34 | 4                                                       | 151                                      | 51     | 30     | 1523 | 30         | 30  | 30       | 126  |
| Vaccine recipient 35 | 4                                                       | 68                                       | 123    | 30     | 553  | 30         | 30  | 30       | 94   |
| Vaccine recipient 36 | 6                                                       | 37                                       | 80     | 150    | 1978 | 30         | 272 | 30       | 203  |
| Vaccine recipient 37 | 4                                                       | 30                                       | 60     | 30     | 869  | 30         | 223 | 30       | 210  |
| Vaccine recipient 38 | 5                                                       | 39                                       | 47     | 30     | 2695 | 30         | 210 | 30       | 90   |
| Vaccine recipient 39 | 4                                                       | 30                                       | 229    | 30     | 839  | 30         | 565 | 30       | 43   |
| Vaccine recipient 40 | 3                                                       | 37                                       | 30     | 30     | 292  | 30         | 30  | 30       | 40   |
| Vaccine recipient 41 | 6                                                       | 34                                       | 34     | 30     | 858  | 30         | 36  | 55       | 57   |
| Vaccine recipient 42 | 5                                                       | 119                                      | 163    | 30     | 1168 | 30         | 31  | 30       | 59   |
| Vaccine recipient 43 | 3                                                       | 57                                       | 30     | 30     | 1072 | 30         | 30  | 30       | 55   |
| Vaccine recipient 44 | 3                                                       | 76                                       | 30     | 30     | 1799 | 30         | 30  | 30       | 51   |
| Vaccine recipient 45 | 4                                                       | 81                                       | 222    | 30     | 2323 | 30         | 30  | 30       | 186  |
| Vaccine recipient 46 | 2                                                       | 30                                       | 30     | 30     | 463  | 30         | 30  | 30       | 56   |
| Vaccine recipient 47 | 4                                                       | 67                                       | 58     | 30     | 971  | 30         | 30  | 30       | 84   |
| Vaccine recipient 48 | 2                                                       | 30                                       | 30     | 30     | 171  | 30         | 30  | 30       | 48   |

|                      |       |          |          |         |            |         |         |         |          |
|----------------------|-------|----------|----------|---------|------------|---------|---------|---------|----------|
| Vaccine recipient 49 | 4     | 45       | 47       | 30      | 152        | 30      | 30      | 30      | 73       |
| Vaccine recipient 50 | 4     | 79       | 109      | 30      | 613        | 30      | 30      | 30      | 216      |
| Vaccine recipient 51 | 4     | 66       | 60       | 30      | 1342       | 30      | 30      | 30      | 110      |
| Vaccine recipient 52 | 8     | 179      | 75       | 83      | 1112       | 91      | 52      | 47      | 108      |
| Vaccine recipient 53 | 3     | 30       | 30       | 116     | 97         | 30      | 30      | 30      | 62       |
| Vaccine recipient 54 | 4     | 47       | 145      | 30      | 232        | 30      | 30      | 30      | 90       |
| Vaccine recipient 55 | 3     | 94       | 32       | 30      | 120        | 30      | 30      | 30      | 30       |
| Vaccine recipient 56 | 5     | 81       | 94       | 30      | 432        | 30      | 113     | 30      | 86       |
| Vaccine recipient 57 | 2     | 30       | 30       | 30      | 101        | 30      | 30      | 30      | 56       |
| Vaccine recipient 58 | 4     | 54       | 61       | 30      | 294        | 30      | 30      | 30      | 89       |
| Vaccine recipient 59 | 5     | 57       | 144      | 30      | 517        | 30      | 98      | 30      | 41       |
| Vaccine recipient 60 | 5     | 263      | 75       | 30      | 1353       | 30      | 37      | 30      | 46       |
| Vaccine recipient 61 | 4     | 30       | 51       | 30      | 155        | 30      | 47      | 30      | 336      |
| Vaccine recipient 62 | 4     | 61       | 147      | 30      | 515        | 30      | 30      | 30      | 250      |
| Vaccine recipient 63 | 5     | 138      | 176      | 33      | 504        | 30      | 30      | 30      | 138      |
| Vaccine recipient 64 | 5     | 209      | 318      | 30      | 1658       | 30      | 50      | 30      | 67       |
| Vaccine recipient 65 | 4     | 181      | 174      | 30      | 481        | 30      | 30      | 30      | 110      |
| Vaccine recipient 66 | 4     | 30       | 98       | 30      | 247        | 30      | 30      | 31      | 65       |
| Vaccine recipient 67 | 4     | 86       | 57       | 30      | 1249       | 30      | 30      | 30      | 805      |
| Vaccine recipient 68 | 3     | 30       | 38       | 30      | 191        | 30      | 30      | 35      | 30       |
| Vaccine recipient 69 | 4     | 108      | 46       | 30      | 496        | 30      | 30      | 30      | 46       |
| Vaccine recipient 70 | 5     | 180      | 125      | 30      | 945        | 30      | 30      | 52      | 67       |
| Vaccine recipient 71 | 4     | 60       | 144      | 30      | 681        | 30      | 30      | 30      | 53       |
| Vaccine recipient 72 | 3     | 30       | 45       | 30      | 160        | 30      | 95      | 30      | 30       |
| Vaccine recipient 73 | 4     | 30       | 884      | 340     | 2077       | 30      | 30      | 30      | 85       |
| Vaccine recipient 74 | 1     | 30       | 30       | 30      | 241        | 30      | 30      | 30      | 30       |
| Vaccine recipient 75 | 4     | 30       | 144      | 30      | 163        | 30      | 37      | 30      | 61       |
| Vaccine recipient 76 | 3     | 30       | 64       | 30      | 315        | 30      | 30      | 30      | 43       |
| Vaccine recipient 77 | 3     | 30       | 30       | 30      | 597        | 30      | 79      | 30      | 81       |
| Vaccine recipient 78 | 5     | 125      | 104      | 30      | 1624       | 30      | 74      | 30      | 142      |
| Vaccine recipient 79 | 5     | 365      | 172      | 30      | 550        | 30      | 82      | 30      | 45       |
| Vaccine recipient 80 | 4     | 86       | 442      | 30      | 375        | 30      | 30      | 30      | 53       |
| Vaccine recipient 81 | 5     | 175      | 78       | 30      | 1323       | 30      | 42      | 30      | 116      |
| Vaccine recipient 82 | 4     | 30       | 189      | 30      | 799        | 30      | 39      | 30      | 61       |
| Vaccine recipient 83 | 3     | 374      | 30       | 30      | 267        | 30      | 30      | 30      | 49       |
| Vaccine recipient 84 | 6     | 76       | 246      | 57      | 771        | 30      | 45      | 30      | 54       |
| Vaccine recipient 85 | 5     | 114      | 155      | 30      | 1232       | 30      | 39      | 30      | 66       |
| Vaccine recipient 86 | 5     | 30       | 191      | 30      | 613        | 30      | 54      | 39      | 63       |
| Vaccine recipient 87 | 5     | 146      | 75       | 30      | 2204       | 30      | 30      | 35      | 40       |
| Vaccine recipient 88 | 5     | 110      | 105      | 30      | 789        | 30      | 33      | 30      | 34       |
| Vaccine recipient 89 | 6     | 977      | 234      | 346     | 611        | 30      | 48      | 30      | 74       |
| <b>Median</b>        | 4     | 68       | 75       | 30      | 614        | 30      | 30      | 30      | 67       |
| <b>(IQR)</b>         | (4-5) | (36-130) | (45-145) | (30-30) | (294-1168) | (30-30) | (30-50) | (30-38) | (41-126) |

IQR: Interquartile range.

**Supplementary Table 5. Baseline characteristics of COVID-19 convalescents who received vaccine in this study**

| Patient ID   | Sex    | Severity of disease | Age (year) | Sample collection time before vaccine administration (day after illness onset) | Type of vaccine administered |             |            | Sample collection time (day after third dose administration) |
|--------------|--------|---------------------|------------|--------------------------------------------------------------------------------|------------------------------|-------------|------------|--------------------------------------------------------------|
|              |        |                     |            |                                                                                | First dose                   | Second dose | Third dose |                                                              |
| Patient 1    | Male   | Non-severe          | 29         | 254                                                                            | Kconvac                      | Kconvac     | Unknown    | 123                                                          |
| Patient 2    | Male   | Non-severe          | 48         | 248                                                                            | Sinovac                      | Sinopharm   | Unknown    | 155                                                          |
| Patient 3    | Male   | Severe              | 47         | 387                                                                            | Zifivax                      | Zifivax     | Zifivax    | 74                                                           |
| Patient 4    | Female | Non-severe          | 29         | 382                                                                            | Sinovac                      | Sinovac     | Unknown    | 201                                                          |
| Patient 5    | Female | Non-severe          | 20         | 376                                                                            | Sinovac                      | Sinovac     | Unknown    | 165                                                          |
| Patient 6    | Female | Non-severe          | 50         | 382                                                                            | Sinovac                      | Sinopharm   | Unknown    | 149                                                          |
| Patient 7    | Female | Non-severe          | 46         | 371                                                                            | Sinovac                      | Sinovac     | Unknown    | 144                                                          |
| Patient 8    | Male   | Non-severe          | 43         | 375                                                                            | Zifivax                      | Zifivax     | Zifivax    | 139                                                          |
| Patient 9    | Female | Non-severe          | 43         | 382                                                                            | Sinovac                      | Sinovac     | Sinopharm  | 15                                                           |
| Patient 10   | Female | Non-severe          | 45         | 386                                                                            | Zifivax                      | Zifivax     | Zifivax    | 166                                                          |
| Patient 11   | Male   | Severe              | 54         | 378                                                                            | Sinopharm                    | Sinovac     | Unknown    | 118                                                          |
| Patient 12   | Male   | Non-severe          | 43         | 378                                                                            | Zifivax                      | Zifivax     | Zifivax    | 151                                                          |
| Patient 13   | Female | Severe              | 72         | 367                                                                            | Sinovac                      | Sinovac     | Unknown    | 150                                                          |
| Patient 14   | Male   | Non-severe          | 47         | 368                                                                            | Sinovac                      | Sinovac     | Sinovac    | 15                                                           |
| Patient 15   | Female | Non-severe          | 19         | 377                                                                            | Sinovac                      | Sinopharm   | Unknown    | 155                                                          |
| Patient 16   | Male   | Non-severe          | 45         | 382                                                                            | Sinopharm                    | Sinopharm   | Sinopharm  | 21                                                           |
| Patient 17   | Female | Non-severe          | 45         | 382                                                                            | Sinopharm                    | Sinopharm   | Sinopharm  | 21                                                           |
| Patient 18   | Female | Non-severe          | 51         | 377                                                                            | Sinopharm                    | Sinopharm   | Sinopharm  | 22                                                           |
| Patient 19   | Female | Non-severe          | 69         | 375                                                                            | Sinopharm                    | Sinovac     | Sinopharm  | 40                                                           |
| Patient 20   | Female | Non-severe          | 47         | 382                                                                            | Zifivax                      | Zifivax     | Zifivax    | 168                                                          |
| Patient 21   | Male   | Severe              | 53         | 382                                                                            | Sinovac                      | Sinopharm   | Sinopharm  | 21                                                           |
| Patient 22   | Male   | Non-severe          | 62         | 375                                                                            | Sinopharm                    | Sinopharm   | Sinopharm  | 15                                                           |
| Patient 23   | Female | Non-severe          | 46         | 366                                                                            | Sinovac                      | Sinopharm   | Sinopharm  | 50                                                           |
| Patient 24   | Male   | severe              | 62         | 372                                                                            | Sinopharm                    | Sinovac     | Sinopharm  | 40                                                           |
| Patient 25   | Male   | Non-severe          | 20         | 370                                                                            | Sinopharm                    | Sinopharm   | Sinopharm  | 26                                                           |
| <b>Media</b> |        |                     | 46         | 377                                                                            |                              |             |            | 118                                                          |
| <b>(IQR)</b> |        |                     | (43-52)    | (371-382)                                                                      |                              |             |            | (22-151)                                                     |

IQR: Interquartile range. Unknown: The type of vaccine administered is unidentified.

**Supplementary Table 6. Baseline characteristics of vaccine recipients who received a third-dose booster in this study**

| Vaccine recipient ID | sex    | Age (year) | Type of booster vaccine administered | Sample collection time after a two-dose standard regimen (day) | Sample collection time after a third booster dose (day) |
|----------------------|--------|------------|--------------------------------------|----------------------------------------------------------------|---------------------------------------------------------|
| Vaccine recipient 1  | Male   | 25         | Sinovac                              | 276                                                            | 92                                                      |
| Vaccine recipient 5  | Male   | 34         | Sinovac                              | 278                                                            | 17                                                      |
| Vaccine recipient 8  | Male   | 45         | Sinovac                              | 277                                                            | 18                                                      |
| Vaccine recipient 16 | Female | 45         | Sinovac                              | 307                                                            | 91                                                      |
| Vaccine recipient 18 | Male   | 23         | Sinovac                              | 287                                                            | 20                                                      |
| Vaccine recipient 23 | Female | 45         | Sinovac                              | 275                                                            | 20                                                      |
| Vaccine recipient 27 | Male   | 44         | Sinovac                              | 271                                                            | 15                                                      |
| Vaccine recipient 30 | Female | 56         | Sinovac                              | 276                                                            | 18                                                      |
| Vaccine recipient 31 | Female | 36         | Sinovac                              | 276                                                            | 92                                                      |
| Vaccine recipient 32 | Female | 37         | Sinovac                              | 276                                                            | 92                                                      |
| Vaccine recipient 41 | Male   | 47         | Sinovac                              | 275                                                            | 24                                                      |
| Vaccine recipient 43 | Female | 33         | Sinovac                              | 275                                                            | 21                                                      |
| Vaccine recipient 47 | Female | 43         | Sinovac                              | 275                                                            | 20                                                      |
| Vaccine recipient 50 | Female | 31         | Sinovac                              | 276                                                            | 22                                                      |
| Vaccine recipient 52 | Female | 49         | Sinovac                              | 275                                                            | 19                                                      |
| Vaccine recipient 55 | Female | 37         | Sinovac                              | 277                                                            | 25                                                      |
| Vaccine recipient 57 | Female | 33         | Sinovac                              | 281                                                            | 19                                                      |
| Vaccine recipient 61 | Female | 28         | Sinovac                              | 276                                                            | 17                                                      |
| Vaccine recipient 66 | Male   | 33         | Sinovac                              | 275                                                            | 21                                                      |
| Vaccine recipient 79 | Female | 33         | Sinovac                              | 281                                                            | 26                                                      |
| Vaccine recipient 80 | Male   | 33         | Sinovac                              | 283                                                            | 17                                                      |
| Vaccine recipient 81 | Female | 29         | Sinovac                              | 276                                                            | 15                                                      |
| Vaccine recipient 84 | Female | 24         | Sinovac                              | 277                                                            | 19                                                      |
| Vaccine recipient 86 | Male   | 51         | Sinovac                              | 283                                                            | 14                                                      |
| Vaccine recipient 88 | Male   | 48         | Sinovac                              | 277                                                            | 22                                                      |
| <b>Media</b>         |        | 36         |                                      | 276                                                            | 20                                                      |
| <b>(IQR)</b>         |        | (33-45)    |                                      | (275-278)                                                      | (18-24)                                                 |

IQR: Interquartile range.

Supplementary Table 7. Characteristics of 116 SARS-CoV-2 nAbs isolated from COVID-19 convalescents and vaccine recipients

| Antibody ID | Inhibition of SARS-CoV-2 (%) | Target domain | Binding breadth (number of sarbecoviruses, n) | Binding activity (OD <sub>450</sub> ) |         |         |         |            |         |           |         |
|-------------|------------------------------|---------------|-----------------------------------------------|---------------------------------------|---------|---------|---------|------------|---------|-----------|---------|
|             |                              |               |                                               | SARS-CoV-2                            | RaTG13  | GX-P5L  | GD18    | SARS-CoV-1 | SZ3     | Civet-007 | WIV1    |
| SCM13-65    | 100%                         | S1            | 8                                             | 2.8062                                | 2.52985 | 2.49365 | 2.51785 | 2.5087     | 2.4905  | 2.55165   | 2.46995 |
| SCM12-61    | 99%                          | S1            | 8                                             | 2.23265                               | 2.3123  | 2.64455 | 2.62635 | 2.67935    | 2.61835 | 2.62605   | 2.5458  |
| VSM9-12     | 98%                          | S1            | 8                                             | 2.3164                                | 2.1653  | 2.46865 | 2.69995 | 2.66285    | 2.66835 | 2.634     | 2.4768  |
| VSM9-44     | 96%                          | S1            | 8                                             | 2.45755                               | 1.91075 | 2.62115 | 2.8548  | 2.8037     | 2.7295  | 2.54645   | 2.45725 |
| VSM13-9     | 96%                          | S1            | 8                                             | 2.5895                                | 1.8777  | 2.5273  | 2.66815 | 2.6164     | 2.66755 | 2.5682    | 2.6089  |
| VSM16-28    | 96%                          | S1            | 8                                             | 2.70435                               | 2.60855 | 2.5751  | 2.80495 | 2.7436     | 2.7385  | 2.6424    | 2.7248  |
| VSM8-83     | 92%                          | S1            | 8                                             | 2.60615                               | 2.3604  | 2.63035 | 2.694   | 2.61895    | 2.6308  | 2.58135   | 2.5558  |
| VSM7-81     | 91%                          | S1            | 8                                             | 2.02705                               | 2.05075 | 2.55055 | 2.6647  | 2.529      | 2.663   | 2.42205   | 2.6244  |
| SCM14-64    | 74%                          | S1            | 8                                             | 2.58055                               | 2.32    | 2.4524  | 2.67155 | 2.65255    | 2.6382  | 2.6268    | 2.62525 |
| VSM16-12    | 65%                          | S1            | 8                                             | 2.35385                               | 1.92175 | 2.4588  | 2.6466  | 2.61235    | 2.5193  | 2.53865   | 2.54125 |
| SCM5-15     | 89%                          | S1            | 8                                             | 2.78925                               | 2.0583  | 2.55505 | 2.7464  | 2.49155    | 2.3376  | 2.6875    | 2.7025  |
| SCM12-55    | 86%                          | S1            | 8                                             | 2.44665                               | 1.9876  | 2.422   | 2.59625 | 2.46505    | 2.59125 | 2.3424    | 2.29865 |
| VSM4-83     | 83%                          | S1            | 8                                             | 2.59865                               | 2.0627  | 2.5851  | 2.83605 | 2.6083     | 2.5052  | 2.80035   | 2.69995 |
| VSM11-26    | 86%                          | S1            | 8                                             | 2.615                                 | 0.8518  | 2.21005 | 2.74215 | 2.42705    | 2.6612  | 2.1119    | 1.7263  |
| VSM14-56    | 89%                          | S1            | 8                                             | 2.4101                                | 0.89395 | 2.38365 | 2.6237  | 1.879      | 2.5271  | 2.25205   | 1.6672  |
| VSM15-10    | 83%                          | S1            | 8                                             | 2.38695                               | 1.0637  | 2.31495 | 2.6292  | 1.99495    | 2.0421  | 1.36755   | 1.57405 |
| VSM9-60     | 80%                          | S1            | 8                                             | 2.3398                                | 1.22375 | 2.1376  | 2.65975 | 2.3588     | 2.51065 | 1.8959    | 0.709   |
| VSM7-92     | 91%                          | S1            | 8                                             | 2.243                                 | 1.9288  | 2.4307  | 2.607   | 0.6666     | 1.2837  | 0.4643    | 0.8975  |
| SCM16-51    | 87%                          | S1            | 8                                             | 2.51715                               | 1.85775 | 1.9935  | 2.66265 | 0.70165    | 0.9151  | 0.6982    | 0.73055 |
| SCM15-89    | 98%                          | S1            | 8                                             | 1.73255                               | 0.3161  | 0.39485 | 2.6946  | 0.6021     | 0.46005 | 0.34385   | 0.32195 |
| VSM14-37    | 99%                          | S1            | 7                                             | 2.52505                               | 0.3104  | 1.11615 | 2.5204  | 0.3146     | 0.45045 | 0.2224    | 0.9137  |
| VSM15-44    | 99%                          | S1            | 7                                             | 1.88205                               | 0.6258  | 1.68365 | 2.74955 | 0.4563     | 0.51275 | 0.214     | 0.3203  |
| SCM14-52    | 52%                          | S1            | 7                                             | 1.9472                                | 0.5311  | 1.1465  | 2.65435 | 0.10225    | 0.576   | 0.5228    | 0.491   |
| SCM9-27     | 88%                          | S1            | 6                                             | 0.43545                               | 0.0323  | 0.0363  | 2.3091  | 0.68275    | 1.11315 | 1.46475   | 0.5203  |
| VSM14-4     | 82%                          | S1            | 6                                             | 2.1628                                | 0.8075  | 1.9614  | 2.7216  | 0.3445     | 0.3911  | 0.26975   | 0.18265 |
| SCM16-60    | 54%                          | S1            | 6                                             | 2.57255                               | 0.27425 | 0.2006  | 0.73605 | 0.41815    | 0.46995 | 0.40145   | 0.4231  |
| SCM16-30    | 100%                         | S1            | 5                                             | 2.4385                                | 0.0802  | 0.0792  | 2.1302  | 1.88435    | 1.88205 | 1.7288    | 0.1438  |
| SCM14-69    | 99%                          | S1            | 5                                             | 2.81045                               | 0.23275 | 0.24655 | 2.90185 | 0.3022     | 0.53315 | 0.35615   | 0.2872  |
| SCM12-62    | 100%                         | S1            | 4                                             | 2.1851                                | 1.6817  | 0.2241  | 2.8286  | 0.17515    | 0.31365 | 0.1732    | 0.18605 |
| VSM13-40    | 99%                          | S1            | 4                                             | 1.545                                 | 0.37665 | 0.4308  | 2.5659  | 0.16165    | 0.2739  | 0.1685    | 0.148   |
| SCM13-74    | 98%                          | S1            | 4                                             | 1.754                                 | 0.89305 | 0.6856  | 2.63255 | 0.24565    | 0.28875 | 0.23735   | 0.253   |
| SCM16-9     | 93%                          | S1            | 4                                             | 2.5377                                | 0.45505 | 0.7012  | 1.3318  | 0.16325    | 0.1642  | 0.1039    | 0.12235 |
| SCM15-26    | 75%                          | S1            | 4                                             | 2.44325                               | 1.81845 | 2.46375 | 2.65545 | 0.0972     | 0.1074  | 0.08585   | 0.0753  |
| SCM11-3     | 100%                         | S1            | 3                                             | 1.52785                               | 1.01745 | 0.25865 | 1.73495 | 0.1409     | 0.1807  | 0.16385   | 0.21765 |
| SCM13-36    | 100%                         | S1            | 3                                             | 2.13525                               | 1.80435 | 0.26565 | 2.5576  | 0.04065    | 0.0561  | 0.03525   | 0.0472  |
| SCM7-2      | 100%                         | S1            | 3                                             | 2.706                                 | 0.043   | 0.04915 | 2.5658  | 0.0343     | 0.0441  | 0.03535   | 0.4955  |
| VSM11-53    | 100%                         | S1            | 3                                             | 2.3472                                | 1.21785 | 0.06735 | 2.56645 | 0.07305    | 0.04755 | 0.074     | 0.0441  |
| VSM12-26    | 100%                         | S1            | 3                                             | 2.44295                               | 0.393   | 0.2445  | 2.40345 | 0.059      | 0.05005 | 0.0435    | 0.0366  |
| VSM14-67    | 100%                         | S1            | 3                                             | 1.21905                               | 0.2265  | 0.255   | 0.7201  | 0.4188     | 0.15525 | 0.1819    | 0.1524  |
| SCM10-50    | 100%                         | S1            | 3                                             | 2.6656                                | 1.3109  | 0.131   | 2.60845 | 0.05865    | 0.0676  | 0.0773    | 0.087   |
| SCM15-45    | 99%                          | S1            | 3                                             | 2.08995                               | 0.08555 | 0.3008  | 2.7616  | 0.07095    | 0.0808  | 0.0921    | 0.0674  |
| VSM15-9     | 99%                          | S1            | 3                                             | 2.1267                                | 0.2794  | 1.2234  | 2.65475 | 0.06015    | 0.0638  | 0.05375   | 0.05485 |
| VSM6-68     | 99%                          | S1            | 3                                             | 1.65995                               | 0.1941  | 1.90055 | 2.6465  | 0.0997     | 0.0962  | 0.0947    | 0.17635 |
| VSM8-76     | 99%                          | S1            | 3                                             | 2.6656                                | 1.3109  | 0.131   | 2.60845 | 0.05865    | 0.0676  | 0.0773    | 0.087   |
| SCM15-13    | 96%                          | S1            | 3                                             | 2.55135                               | 0.76755 | 0.13125 | 2.65425 | 0.05635    | 0.16295 | 0.1301    | 0.1486  |
| VSM10-4     | 94%                          | S1            | 3                                             | 2.33205                               | 0.14715 | 1.82555 | 1.8614  | 0.0712     | 0.12115 | 0.095     | 0.11945 |
| VSM6-38     | 94%                          | S1            | 3                                             | 2.61445                               | 0.07125 | 1.02875 | 2.5854  | 0.09245    | 0.07315 | 0.07025   | 0.06765 |
| VSM14-63    | 79%                          | S1            | 3                                             | 2.6698                                | 0.254   | 1.71985 | 2.48395 | 0.10805    | 0.18515 | 0.0973    | 0.0981  |
| VSM12-37    | 100%                         | S1            | 3                                             | 2.59615                               | 0.64235 | 0.0493  | 2.5779  | 0.1147     | 0.0538  | 0.0531    | 0.0359  |
| VSM8-40     | 61%                          | S1            | 3                                             | 1.96715                               | 0.5499  | 0.4341  | 0.05475 | 0.2969     | 0.1276  | 0.0782    | 0.0407  |
| VSM7-26     | 52%                          | S1            | 3                                             | 1.1878                                | 0.7307  | 0.95435 | 0.1052  | 0.2024     | 0.08495 | 0.10005   | 0.0555  |
| SCM9-68     | 50%                          | S1            | 3                                             | 0.62085                               | 0.6018  | 0.4713  | 0.07875 | 0.0707     | 0.03755 | 0.0427    | 0.11115 |
| VSM9-53     | 65%                          | S1            | 3                                             | 0.7187                                | 0.3836  | 0.20065 | 0.451   | 0.05445    | 0.0381  | 0.0352    | 0.0427  |
| SCM10-2     | 100%                         | S1            | 2                                             | 2.4662                                | 0.0367  | 0.04565 | 2.66875 | 0.08075    | 0.02995 | 0.03835   | 0.0553  |
| SCM14-73    | 100%                         | S1            | 2                                             | 2.62355                               | 0.11685 | 0.11465 | 2.7118  | 0.14485    | 0.18965 | 0.14555   | 0.1195  |
| SCM15-85    | 100%                         | S1            | 2                                             | 2.53125                               | 0.1116  | 0.07355 | 2.5751  | 0.08345    | 0.1113  | 0.08505   | 0.10575 |
| SCM16-15    | 100%                         | S1            | 2                                             | 2.56165                               | 0.1185  | 0.08385 | 2.50655 | 0.10225    | 0.1224  | 0.0847    | 0.1064  |
| SCM9-57     | 100%                         | S1            | 2                                             | 2.05645                               | 0.05535 | 0.05535 | 2.7767  | 0.0646     | 0.0343  | 0.03405   | 0.03715 |
| SCM9-63     | 100%                         | S1            | 2                                             | 1.7056                                | 0.0865  | 0.08405 | 2.5141  | 0.0989     | 0.09405 | 0.09975   | 0.09645 |
| VSM12-60    | 100%                         | S1            | 2                                             | 1.86925                               | 0.27625 | 0.05755 | 2.43325 | 0.11385    | 0.0637  | 0.09      | 0.06425 |
| VSM14-58    | 100%                         | S1            | 2                                             | 2.52655                               | 0.0948  | 0.1259  | 2.67095 | 0.09375    | 0.13485 | 0.0653    | 0.0756  |

|          |      |    |   |         |         |         |         |         |         |         |         |
|----------|------|----|---|---------|---------|---------|---------|---------|---------|---------|---------|
| VSM14-89 | 100% | S1 | 2 | 1.86225 | 0.15025 | 0.1324  | 2.5947  | 0.1966  | 0.22765 | 0.24285 | 0.2012  |
| VSM7-80  | 100% | S1 | 2 | 2.12385 | 0.0586  | 0.04935 | 2.69095 | 0.1255  | 0.05375 | 0.07095 | 0.09185 |
| VSM7-88  | 100% | S1 | 2 | 0.60655 | 0.4099  | 0.2926  | 0.18495 | 0.0703  | 0.0995  | 0.0866  | 0.0876  |
| VSM8-70  | 100% | S1 | 2 | 2.1424  | 0.06365 | 0.0659  | 2.57415 | 0.0461  | 0.06065 | 0.08215 | 0.0677  |
| SCM10-91 | 99%  | S1 | 2 | 1.06275 | 0.0403  | 0.0605  | 2.6481  | 0.0939  | 0.0331  | 0.0328  | 0.06125 |
| SCM11-46 | 99%  | S1 | 2 | 1.9695  | 0.0388  | 0.0349  | 2.65385 | 0.0481  | 0.04585 | 0.05175 | 0.04835 |
| SCM13-37 | 99%  | S1 | 2 | 0.9566  | 0.20135 | 0.03785 | 2.35985 | 0.0662  | 0.10365 | 0.0374  | 0.05545 |
| SCM14-37 | 99%  | S1 | 2 | 1.0497  | 0.14715 | 0.04205 | 2.7545  | 0.0725  | 0.09185 | 0.03865 | 0.05235 |
| SCM14-5  | 99%  | S1 | 2 | 2.01295 | 0.0675  | 0.0636  | 2.3051  | 0.07415 | 0.07175 | 0.09025 | 0.0703  |
| SCM14-53 | 99%  | S1 | 2 | 2.3041  | 0.2353  | 0.13375 | 2.879   | 0.10215 | 0.25055 | 0.25725 | 0.2137  |
| SCM14-91 | 99%  | S1 | 2 | 1.99315 | 0.13315 | 0.1133  | 2.7138  | 0.14045 | 0.1652  | 0.23395 | 0.1278  |
| SCM15-38 | 99%  | S1 | 2 | 1.45255 | 0.23485 | 0.1245  | 2.5827  | 0.16165 | 0.24065 | 0.2008  | 0.17455 |
| SCM15-52 | 99%  | S1 | 2 | 2.76465 | 0.0613  | 0.05485 | 1.40445 | 0.05405 | 0.07445 | 0.06795 | 0.088   |
| SCM15-61 | 99%  | S1 | 2 | 2.4758  | 0.06525 | 0.0543  | 2.69655 | 0.0492  | 0.0828  | 0.05785 | 0.0914  |
| SCM15-66 | 99%  | S1 | 2 | 1.5837  | 0.0789  | 0.0605  | 2.68315 | 0.06325 | 0.0882  | 0.07    | 0.0932  |
| SCM16-14 | 99%  | S1 | 2 | 1.1361  | 0.1052  | 0.11165 | 2.5698  | 0.08985 | 0.08075 | 0.09635 | 0.07075 |
| SCM9-24  | 99%  | S1 | 2 | 2.8193  | 0.05475 | 0.07335 | 2.7361  | 0.0872  | 0.08995 | 0.0427  | 0.06825 |
| VSM13-20 | 99%  | S1 | 2 | 1.75045 | 0.0883  | 0.0533  | 2.03055 | 0.04215 | 0.0628  | 0.069   | 0.05845 |
| VSM16-55 | 99%  | S1 | 2 | 2.1228  | 0.0371  | 0.0351  | 2.5719  | 0.0492  | 0.0333  | 0.04565 | 0.03475 |
| VSM6-37  | 99%  | S1 | 2 | 1.67745 | 0.21505 | 0.22525 | 2.2861  | 0.12645 | 0.08555 | 0.0995  | 0.0743  |
| VSM7-36  | 99%  | S1 | 2 | 2.3559  | 0.0757  | 0.09705 | 2.64535 | 0.063   | 0.04935 | 0.05225 | 0.0514  |
| VSM7-73  | 99%  | S1 | 2 | 2.46385 | 0.10505 | 0.0878  | 2.60255 | 0.1006  | 0.09325 | 0.12585 | 0.08645 |
| VSM7-83  | 99%  | S1 | 2 | 2.1885  | 0.06305 | 0.0804  | 2.58415 | 0.06055 | 0.0481  | 0.058   | 0.0473  |
| VSM9-47  | 99%  | S1 | 2 | 2.2672  | 0.1428  | 0.12095 | 2.72415 | 0.2799  | 0.28    | 0.1059  | 0.10555 |
| SCM11-4  | 98%  | S1 | 2 | 0.74635 | 0.03495 | 0.03645 | 2.46335 | 0.06225 | 0.0375  | 0.0403  | 0.0477  |
| SCM13-40 | 98%  | S1 | 2 | 2.29315 | 0.086   | 0.04405 | 2.64735 | 0.0403  | 0.04195 | 0.03685 | 0.03705 |
| SCM15-27 | 98%  | S1 | 2 | 2.46005 | 0.268   | 0.15    | 2.83875 | 0.18895 | 0.23865 | 0.2211  | 0.1801  |
| VSM14-50 | 97%  | S1 | 2 | 1.68615 | 0.0681  | 0.09185 | 2.30405 | 0.1093  | 0.13225 | 0.0606  | 0.074   |
| VSM16-56 | 97%  | S1 | 2 | 1.61525 | 0.03595 | 0.0351  | 2.5588  | 0.0363  | 0.03415 | 0.03675 | 0.0689  |
| SCM11-12 | 96%  | S1 | 2 | 2.10405 | 0.07945 | 0.07455 | 2.1117  | 0.08985 | 0.0749  | 0.0882  | 0.07095 |
| SCM11-24 | 96%  | S1 | 2 | 2.0802  | 0.0399  | 0.0455  | 2.33285 | 0.0397  | 0.0441  | 0.0426  | 0.04015 |
| VSM6-66  | 96%  | S1 | 2 | 1.29425 | 0.06745 | 0.0645  | 2.5331  | 0.0475  | 0.05595 | 0.07055 | 0.05985 |
| VSM16-83 | 95%  | S1 | 2 | 1.7172  | 0.0455  | 0.03535 | 2.71275 | 0.05665 | 0.0329  | 0.04765 | 0.05855 |
| VSM13-2  | 94%  | S1 | 2 | 2.68895 | 0.06035 | 0.0602  | 2.52285 | 0.0492  | 0.09435 | 0.03625 | 0.0429  |
| VSM13-85 | 94%  | S1 | 2 | 1.29425 | 0.06745 | 0.0645  | 2.5331  | 0.0475  | 0.05595 | 0.07055 | 0.05985 |
| SCM13-29 | 86%  | S1 | 2 | 2.21685 | 0.1582  | 0.04255 | 2.4002  | 0.1661  | 0.14795 | 0.0572  | 0.0389  |
| VSM12-6  | 82%  | S2 | 2 | 0.6299  | 0.04665 | 0.0546  | 1.38875 | 0.05995 | 0.04715 | 0.04935 | 0.04465 |
| SCM10-74 | 74%  | S1 | 2 | 1.7172  | 0.0455  | 0.03535 | 2.71275 | 0.05665 | 0.0329  | 0.04765 | 0.05855 |
| VSM8-65  | 74%  | S1 | 2 | 0.60655 | 0.4099  | 0.2926  | 0.18495 | 0.0703  | 0.0995  | 0.0866  | 0.0876  |
| SCM9-62  | 63%  | S1 | 2 | 1.75045 | 0.0883  | 0.0533  | 2.03055 | 0.04215 | 0.0628  | 0.069   | 0.05845 |
| VSM14-93 | 62%  | S1 | 2 | 2.1228  | 0.0371  | 0.0351  | 2.5719  | 0.0492  | 0.0333  | 0.04565 | 0.03475 |
| VSM11-7  | 58%  | S1 | 2 | 0.45385 | 0.1138  | 0.1038  | 0.8769  | 0.12955 | 0.15685 | 0.07915 | 0.0441  |
| VSM6-39  | 55%  | S1 | 2 | 0.48225 | 0.11985 | 0.1172  | 0.4182  | 0.1408  | 0.09045 | 0.07305 | 0.0671  |
| SCM10-94 | 53%  | S1 | 2 | 0.9566  | 0.20135 | 0.03785 | 2.35985 | 0.0662  | 0.10365 | 0.0374  | 0.05545 |
| VSM12-46 | 100% | S1 | 1 | 0.45635 | 0.0635  | 0.0375  | 0.07965 | 0.0667  | 0.0577  | 0.0595  | 0.0398  |
| SCM11-45 | 97%  | S1 | 1 | 0.4486  | 0.0403  | 0.0364  | 0.0459  | 0.03265 | 0.04355 | 0.03355 | 0.04685 |
| VSM12-55 | 97%  | S1 | 1 | 1.0794  | 0.10035 | 0.04795 | 0.2162  | 0.06955 | 0.0592  | 0.0859  | 0.038   |
| VSM13-30 | 96%  | S1 | 1 | 1.82005 | 0.0497  | 0.0393  | 0.1554  | 0.04225 | 0.05835 | 0.0881  | 0.0754  |
| SCM16-40 | 93%  | S1 | 1 | 0.4486  | 0.0403  | 0.0364  | 0.0459  | 0.03265 | 0.04355 | 0.03355 | 0.04685 |
| SCM14-24 | 92%  | S1 | 1 | 1.28725 | 0.0586  | 0.03285 | 0.0665  | 0.07225 | 0.06385 | 0.062   | 0.0802  |
| VSM16-43 | 92%  | S1 | 1 | 0.5825  | 0.23485 | 0.1573  | 0.05405 | 0.05735 | 0.03645 | 0.0489  | 0.0422  |
| VSM12-15 | 91%  | S1 | 1 | 1.28725 | 0.0586  | 0.03285 | 0.0665  | 0.07225 | 0.06385 | 0.062   | 0.0802  |
| VSM14-86 | 85%  | S1 | 1 | 1.82005 | 0.0497  | 0.0393  | 0.1554  | 0.04225 | 0.05835 | 0.0881  | 0.0754  |
| VSM9-51  | 81%  | S1 | 1 | 0.7153  | 0.1682  | 0.17655 | 0.12115 | 0.0407  | 0.0385  | 0.0328  | 0.04275 |
| VSM7-75  | 61%  | S2 | 8 | 1.95715 | 2.7843  | 2.62135 | 2.776   | 2.31435 | 2.22285 | 2.64155 | 2.66965 |

The neutralization activity of the nAb was determined by measuring its inhibition of pseudotyped sarbecovirus particles at a concentration of 10 µg/mL.

The binding activity was determined by measuring the OD<sub>450</sub> value of the antibody against the spike S1 or S2 proteins of sarbecoviruses at a concentration of 1 µg/mL. An average OD<sub>450</sub> value three-fold greater than the cut-off value (the average OD<sub>450</sub> value of the negative antibody) was considered a positive readout.

**Supplementary Table 8. Baseline information of selected 33 broad nAbs**

| Antibody ID | Antibody origin      | Sex   | Age (year) | COVID-19 convalescents | Severity of disease | Vaccination record | Sample collection time (day after the last dose administration) |
|-------------|----------------------|-------|------------|------------------------|---------------------|--------------------|-----------------------------------------------------------------|
| SCM16-9     | Patient 1            | Male  | 29         | Yes                    | Non-severe          | Third dose         | 123                                                             |
| SCM15-89    | Patient 3            | Male  | 47         | Yes                    | Severe              | Third dose         | 74                                                              |
| SCM16-30    | Patient 3            | Male  | 47         | Yes                    | Severe              | Third dose         | 74                                                              |
| SCM16-51    | Patient 3            | Male  | 47         | Yes                    | Severe              | Third dose         | 74                                                              |
| SCM16-60    | Patient 3            | Male  | 47         | Yes                    | Severe              | Third dose         | 74                                                              |
| SCM9-27     | Patient 3            | Male  | 47         | Yes                    | Severe              | Third dose         | 74                                                              |
| SCM12-61    | Patient 5            | Femal | 50         | Yes                    | Non-severe          | Third dose         | 165                                                             |
| SCM12-62    | Patient 5            | Femal | 50         | Yes                    | Non-severe          | Third dose         | 165                                                             |
| SCM12-55    | Patient 5            | Femal | 50         | Yes                    | Non-severe          | Third dose         | 165                                                             |
| SCM15-26    | Patient 8            | Male  | 43         | Yes                    | Severe              | Third dose         | 139                                                             |
| SCM13-65    | Patient 11           | Male  | 54         | Yes                    | Severe              | Third dose         | 118                                                             |
| SCM13-74    | Patient 11           | Male  | 54         | Yes                    | Severe              | Third dose         | 118                                                             |
| SCM14-52    | Patient 11           | Male  | 54         | Yes                    | Severe              | Third dose         | 118                                                             |
| SCM14-64    | Patient 11           | Male  | 54         | Yes                    | Severe              | Third dose         | 118                                                             |
| SCM14-69    | Patient 11           | Male  | 54         | Yes                    | Severe              | Third dose         | 118                                                             |
| SCM5-15     | Patient 38           | Femal | 32         | Yes                    | Non-severe          | Third dose         | 50                                                              |
| VSM15-44    | Vaccine recipient 3  | Femal | 26         | NO                     | -                   | Third dose         | 14                                                              |
| VSM13-40    | Vaccine recipient 7  | Femal | 26         | NO                     | -                   | Third dose         | 16                                                              |
| VSM13-9     | Vaccine recipient 7  | Femal | 26         | NO                     | -                   | Third dose         | 16                                                              |
| VSM16-12    | Vaccine recipient 11 | Male  | 26         | NO                     | -                   | Two dose           | 66                                                              |
| VSM14-56    | Vaccine recipient 17 | Male  | 33         | NO                     | -                   | Third dose         | 15                                                              |
| VSM15-10    | Vaccine recipient 17 | Male  | 33         | NO                     | -                   | Third dose         | 15                                                              |
| VSM14-37    | Vaccine recipient 18 | Male  | 23         | NO                     | -                   | Third dose         | 15                                                              |
| VSM14-4     | Vaccine recipient 18 | Male  | 23         | NO                     | -                   | Third dose         | 15                                                              |
| VSM16-28    | Vaccine recipient 23 | Femal | 45         | NO                     | -                   | Two dose           | 66                                                              |
| VSM11-26    | Vaccine recipient 39 | Femal | 28         | NO                     | -                   | Two dose           | 16                                                              |
| VSM4-83     | Vaccine recipient 80 | Male  | 33         | NO                     | -                   | Two dose           | 17                                                              |
| VSM7-81     | Vaccine recipient 81 | Male  | 29         | NO                     | -                   | Third dose         | 15                                                              |
| VSM7-92     | Vaccine recipient 81 | Male  | 29         | NO                     | -                   | Third dose         | 15                                                              |
| VSM8-83     | Vaccine recipient 81 | Male  | 29         | NO                     | -                   | Third dose         | 15                                                              |
| VSM9-12     | Vaccine recipient 83 | Male  | 37         | NO                     | -                   | Third dose         | 20                                                              |
| VSM9-44     | Vaccine recipient 83 | Male  | 37         | NO                     | -                   | Third dose         | 20                                                              |
| VSM9-60     | Vaccine recipient 83 | Male  | 37         | NO                     | -                   | Third dose         | 20                                                              |

“-”: The vaccine recipient was not infected with COVID-19.



Supplementary Table 9. Neutralization profiles of selected 33 broad nAbs

| Antibody ID | Neutralization breadth<br>(number of sarbecoviruses, n) | Inhibition (%) |        |        |      |            |     |           |      |
|-------------|---------------------------------------------------------|----------------|--------|--------|------|------------|-----|-----------|------|
|             |                                                         | SARS-CoV-2     | RaTG13 | GX-P5L | GD18 | SARS-CoV-1 | SZ3 | Civet-007 | WIV1 |
| SCM12-61    | 8                                                       | 100            | 93     | 100    | 100  | 99         | 96  | 100       | 100  |
| VSM16-12    | 8                                                       | 80             | 70     | 95     | 100  | 90         | 80  | 75        | 98   |
| SCM13-65    | 8                                                       | 100            | 90     | 100    | 100  | 100        | 95  | 98        | 100  |
| VSM9-44     | 8                                                       | 96             | 90     | 100    | 100  | 100        | 95  | 94        | 100  |
| VSM8-83     | 8                                                       | 92             | 90     | 98     | 98   | 90         | 94  | 87        | 99   |
| VSM9-12     | 8                                                       | 98             | 93     | 95     | 100  | 85         | 90  | 80        | 98   |
| VSM13-9     | 7                                                       | 96             | 26     | 65     | 85   | 89         | 71  | 82        | 76   |
| SCM14-64    | 6                                                       | 74             | 63     | 45     | 93   | 77         | 0   | 64        | 51   |
| VSM15-10    | 6                                                       | 83             | 50     | 59     | 83   | 29         | 67  | 60        | 48   |
| VSM4-83     | 6                                                       | 83             | 5      | 38     | 76   | 50         | 85  | 74        | 81   |
| SCM16-30    | 5                                                       | 100            | 5      | 0      | 100  | 98         | 82  | 98        | 46   |
| SCM12-62    | 5                                                       | 100            | 43     | 48     | 100  | 13         | 78  | 68        | 57   |
| VSM14-37    | 5                                                       | 99             | 64     | 92     | 100  | 27         | 5   | 0         | 75   |
| SCM15-89    | 5                                                       | 98             | 4      | 16     | 100  | 27         | 59  | 52        | 50   |
| SCM9-27     | 5                                                       | 88             | 46     | 0      | 95   | 75         | 46  | 63        | 55   |
| VSM7-92     | 5                                                       | 91             | 0      | 23     | 76   | 0          | 75  | 52        | 53   |
| SCM5-15     | 5                                                       | 89             | 0      | 33     | 79   | 5          | 82  | 89        | 90   |
| VSM15-44    | 4                                                       | 99             | 60     | 98     | 98   | 18         | 30  | 3         | 7    |
| VSM13-40    | 4                                                       | 99             | 53     | 87     | 100  | 28         | 30  | 20        | 9    |
| VSM9-60     | 4                                                       | 80             | 42     | 55     | 82   | 34         | 34  | 64        | 42   |
| VSM16-28    | 4                                                       | 96             | 26     | 25     | 91   | 30         | 68  | 48        | 82   |
| VSM7-81     | 4                                                       | 91             | 40     | 0      | 74   | 73         | 0   | 0         | 79   |
| VSM14-56    | 4                                                       | 89             | 74     | 57     | 84   | 26         | 29  | 7         | 25   |
| VSM11-26    | 4                                                       | 86             | 42     | 10     | 6    | 30         | 73  | 81        | 55   |
| SCM13-74    | 3                                                       | 98             | 0      | 95     | 100  | 6          | 25  | 21        | 38   |
| SCM15-26    | 3                                                       | 75             | 31     | 60     | 84   | 25         | 0   | 18        | 34   |
| SCM12-55    | 3                                                       | 86             | 0      | 27     | 81   | 34         | 0   | 15        | 70   |
| SCM16-60    | 3                                                       | 54             | 6      | 0      | 71   | 0          | 0   | 54        | 44   |
| SCM14-69    | 2                                                       | 99             | 13     | 0      | 100  | 36         | 1   | 30        | 31   |
| SCM16-9     | 2                                                       | 93             | 0      | 9      | 86   | 0          | 26  | 36        | 22   |
| VSM14-4     | 2                                                       | 82             | 41     | 48     | 71   | 29         | 8   | 0         | 1    |
| SCM16-51    | 2                                                       | 87             | 0      | 35     | 92   | 9          | 7   | 47        | 48   |
| SCM14-52    | 2                                                       | 52             | 16     | 19     | 84   | 21         | 0   | 45        | 43   |

The neutralization activity of the nAb was determined by measuring its inhibition of pseudotyped sarbecovirus particles at a concentration of 10 µg/mL. An inhibition rate of greater than 50% was considered a positive readout.
